# Supplementary material for: Quantitative Analysis Reveals that Actin and Src-Family Kinases Regulate Nuclear YAP1 and Its Export
Source: PubMed Central journal article supplement (PMC6035388; doi:10.1016/j.cels.2018.05.006), 2018-06-27
Supplement: mmc1.pdf [file mmc1.pdf]

**Cell Systems, Volume 6**

**Supplemental Information**

**Quantitative Analysis Reveals that Actin  
and Src-Family Kinases Regulate  
Nuclear YAP1 and Its Export**

**Nil Ege, Anna M. Dowbaj, Ming Jiang, Michael Howell, Steven Hooper, Charles Foster, Robert P. Jenkins, and Erik Sahai**

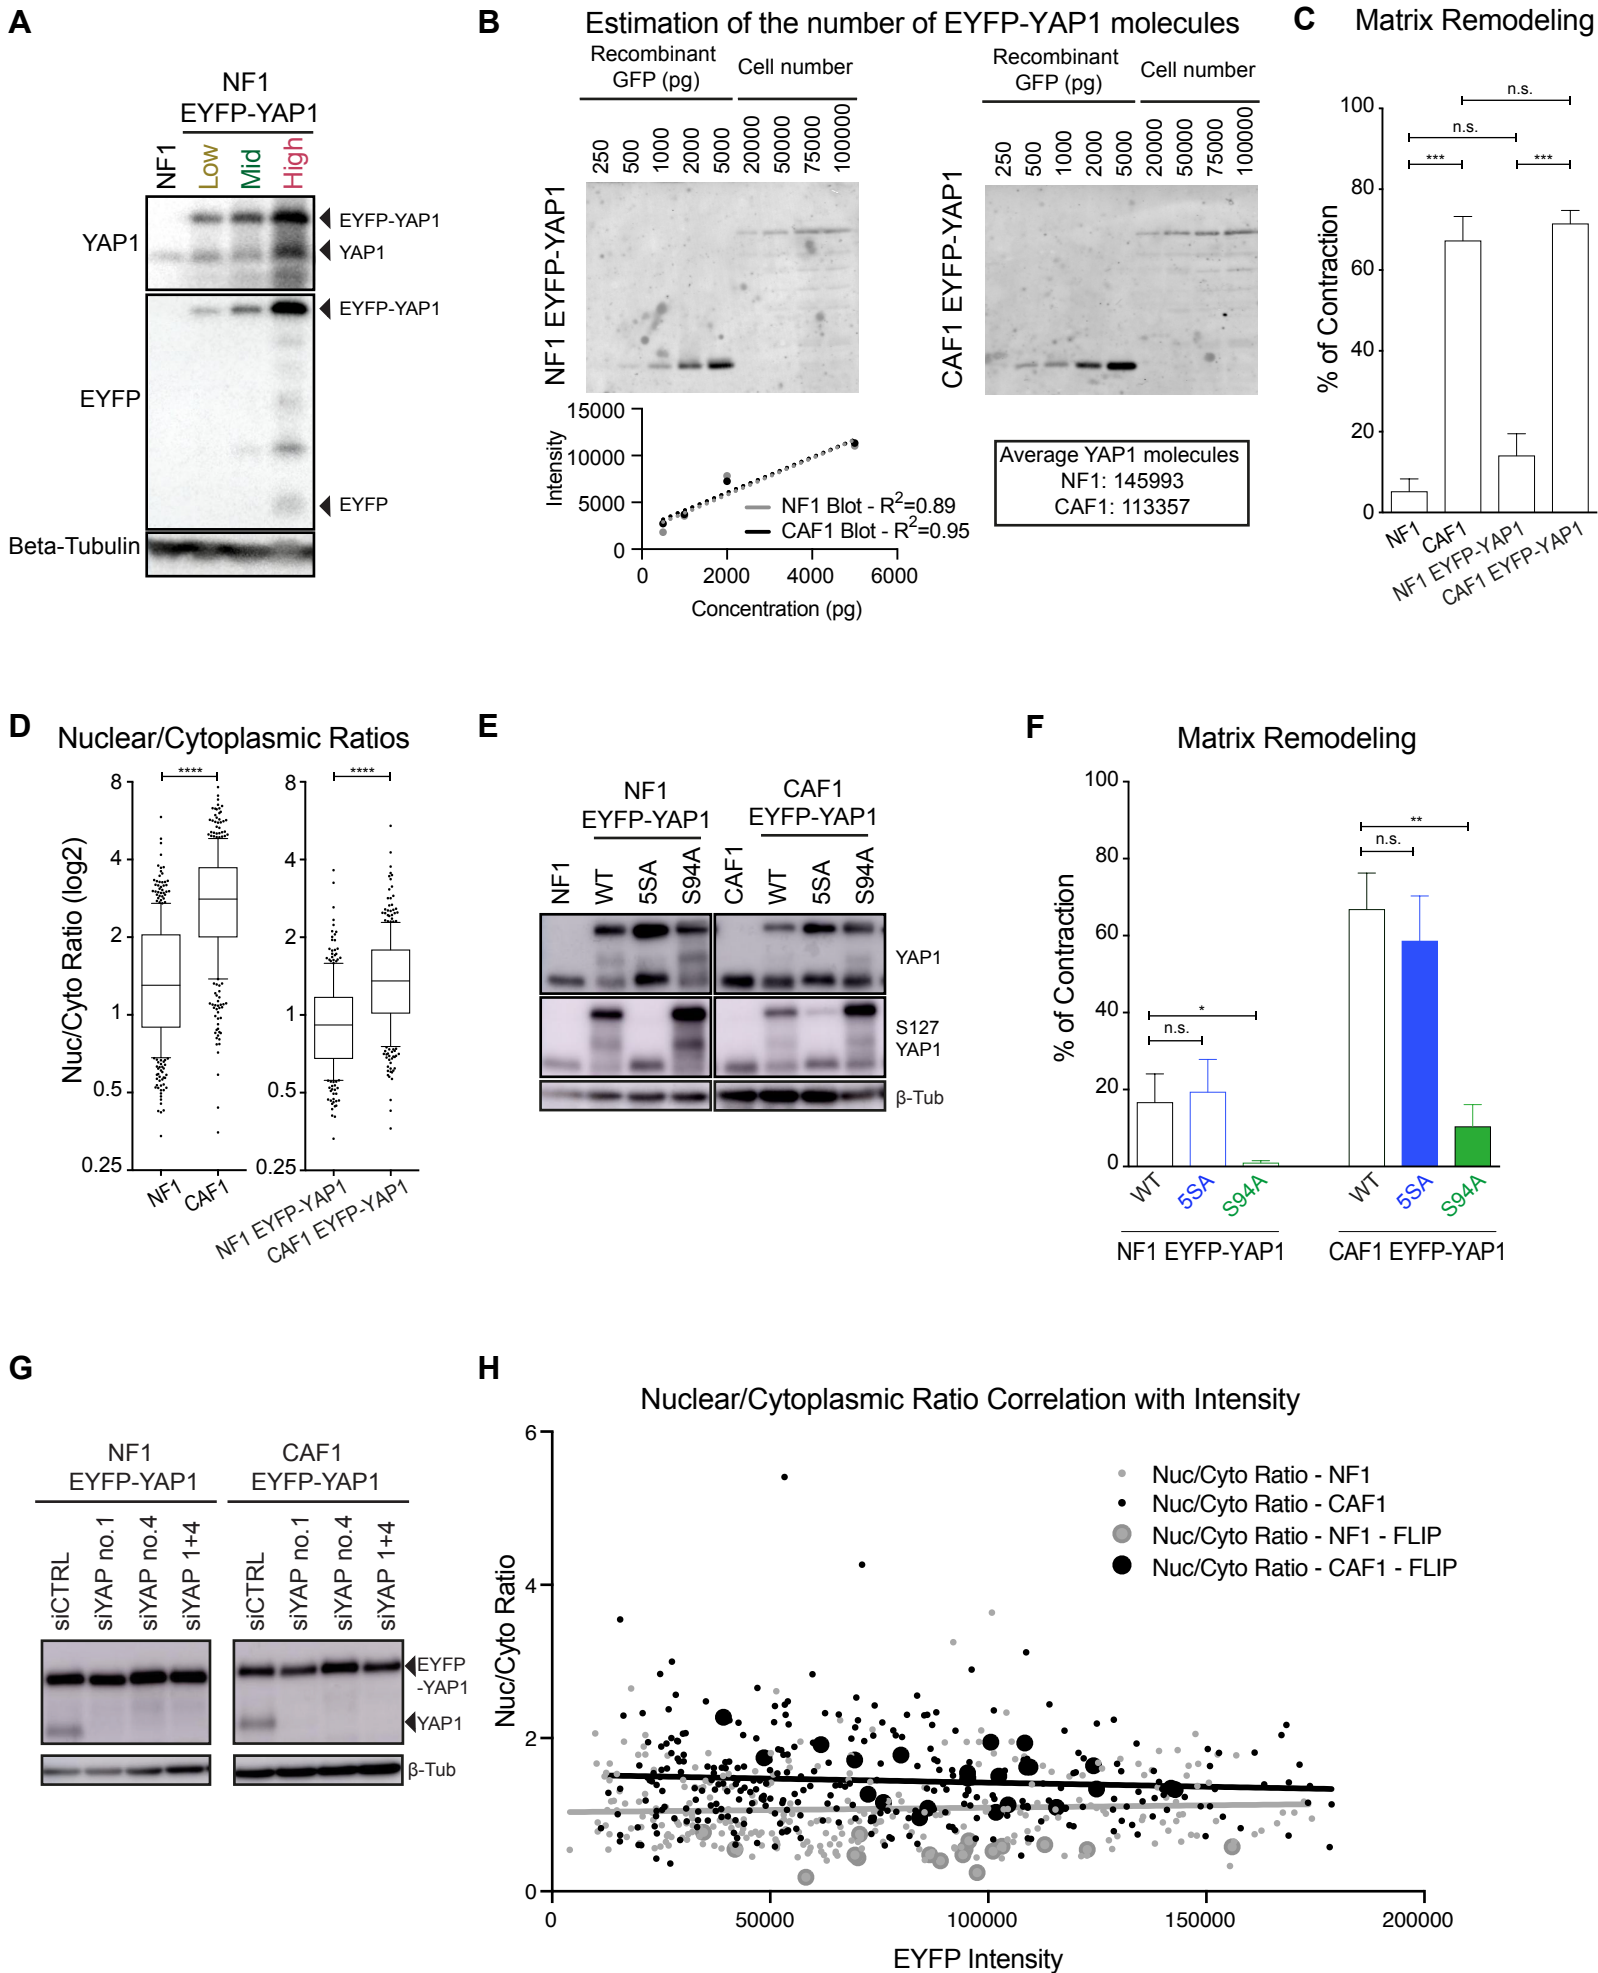

**Supplemental Figure S1: Overexpression of EYFP-YAP1 maintains fibroblasts phenotype. Related to Figure1: Legends next page.**



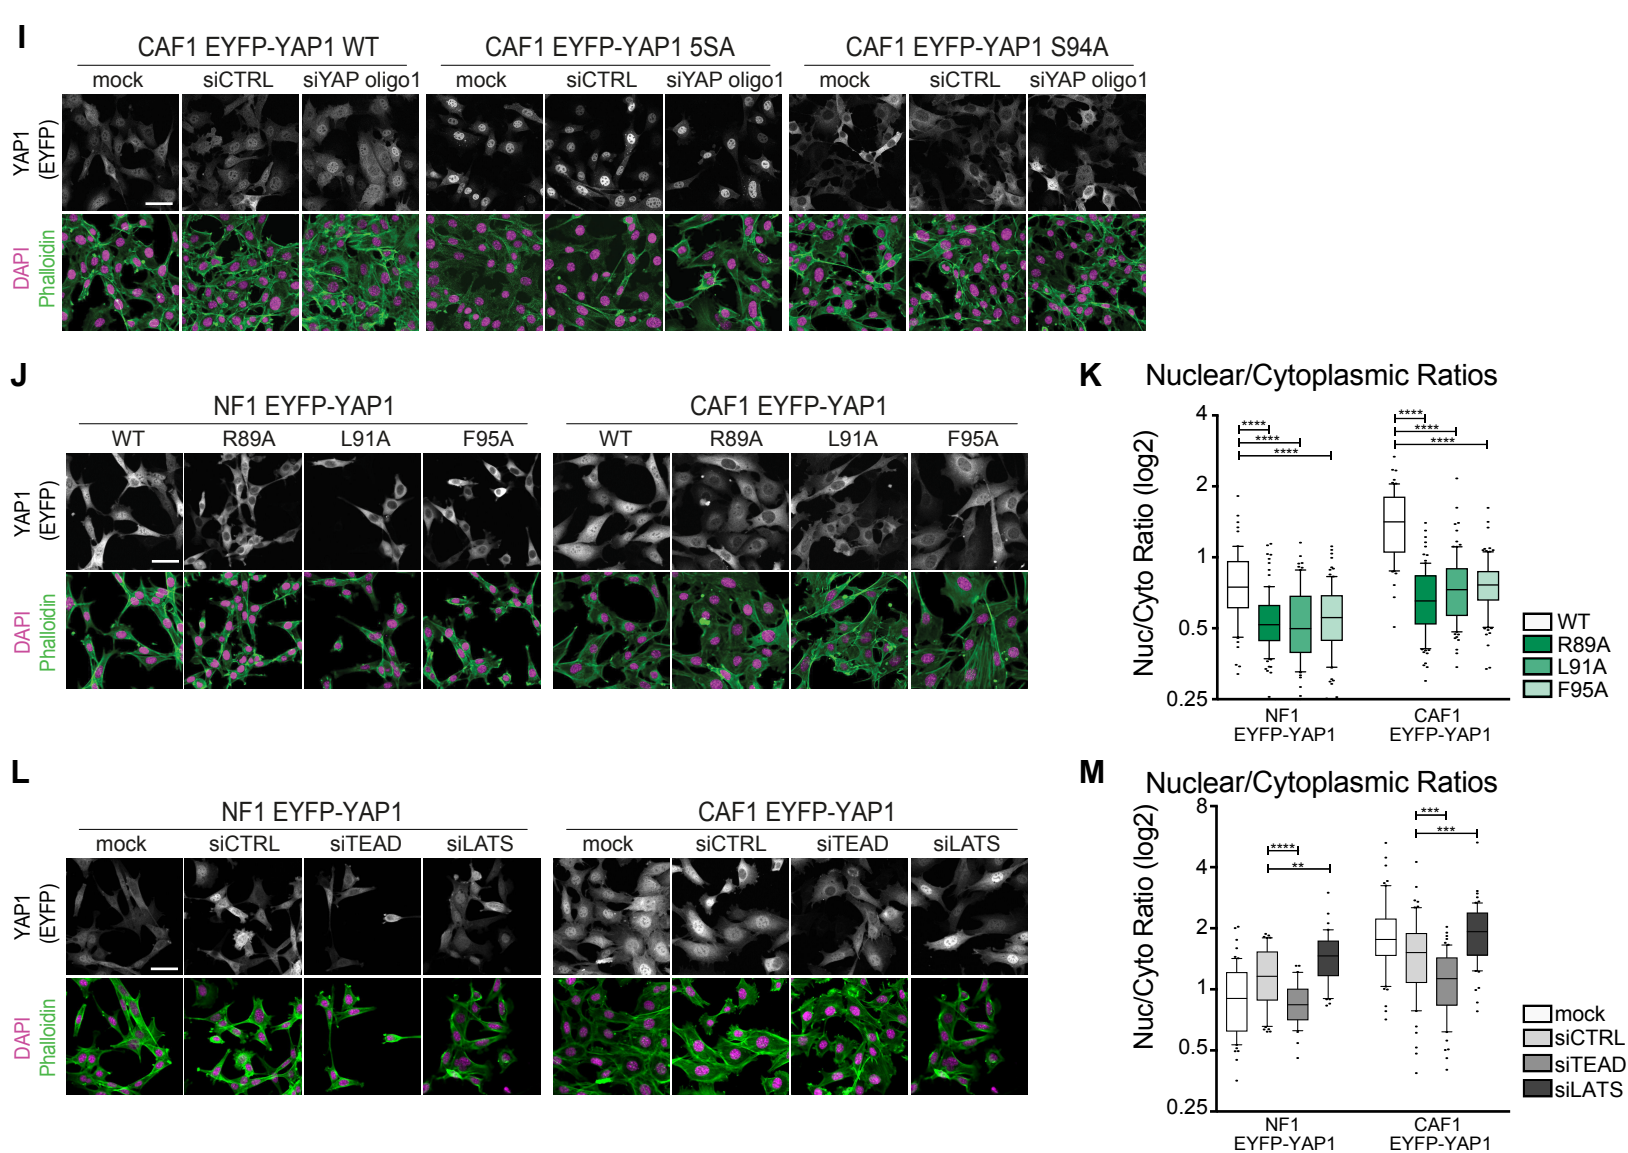

**Supplemental Figure S1: Overexpression of EYFP-YAP1 maintains fibroblasts phenotype. Related to Figure 1:**

(A) Western blot showing the expressions of EYFP-YAP1 (92kDa) versus endogenous YAP1 (61kDa), in NF1 WT and in three different FACS-sorted populations (Low-Mid-High) of NF1 EYFP-YAP1. EYFP (27kDa) and Beta-Tubulin (42kDa) are also presented. (B) Western Blot and linear regression analyses to assess the number of EYFP-YAP1 molecules in both NF1 and CAF1, using different concentration of GFP recombinant proteins. (C) Contraction assay of WT and EYFP-YAP1 expressing NF1 and CAF1 in normal media (NM). Bars represent mean  $\pm$  s.e.m. of 5 independent experiments. (D) Box-plot (10&90) of nuclear-to-cytoplasmic ratio (log<sub>2</sub> scale) of endogenous YAP1 (left) and EYFP-YAP1 (right) in NF1 and CAF1.  $n > 170$  cells for each condition from at least 3 independent experiments. (E) Western Blot showing the expressions of EYFP-YAP1\_WT, 5SA, S94A (92kDa) versus endogenous YAP1 (61kDa), in NF1 and CAF1. Phosphorylation of Serine 127 and Tubulin (42kDa) are also presented. (F) Contraction assay of EYFP-YAP1, EYFP-YAP1\_5SA and EYFP-YAP1\_S94A expressing NF1 and CAF1. Bars represent mean  $\pm$  s.e.m. of 5 independent experiments. (G) Western blot showing the expression of EYFP-YAP1\_WT (92kDa) and endogenous YAP1 (61kDa) after the siRNA depletion of endogenous YAP1 protein. Beta-tubulin (42kDa) loading control is also presented. (H) Scatterplot showing the relative expression level of EYFP-YAP1 and its nuclear-to-cytoplasmic distribution. Grey dots are NF1 data points and black dots are CAF1 data points – in both cases larger dots indicate data from cells used in the FLIP analysis in Figure 4. Horizontal trend lines indicate that expression level is not correlated with localization (linear regression slope non-significant, Pearson and Spearman correlation coefficients non-significant). (I) Representative images of EYFP-YAP1 localization in CAF1 EYFP-YAP1\_WT, CAF1 EYFP-YAP1\_5SA and CAF1 EYFP-YAP1\_S94A after siRNA knockdown of endogenous YAP1. Scale bar, 50 $\mu$ m. (J) Representative images of EYFP-YAP1 localization in NF1 and CAF1 cell lines expressing EYFP-YAP1\_WT vs TEAD-binding mutants EYFP-YAP1\_R89A, EYFP-YAP1\_L91A, and EYFP-YAP1\_F95A. Scale bar, 50 $\mu$ m. (K) Boxplot (10&90) of nuclear-to-cytoplasmic ratio (log<sub>2</sub> scale) corresponding to quantification of (J).  $n > 90$  cells for each condition from at least 3 independent experiments. (L) Representative images of EYFP-YAP1 localization in NF1 and CAF1 cell lines expressing EYFP-YAP1\_WT after siRNA knockdown of TEAD1-4 or LATS1-2. Scale bar, 50 $\mu$ m. (M) Box-plot (10&90) of nuclear-to-cytoplasmic ratio (log<sub>2</sub> scale) corresponding to quantification of (L).  $n > 36$  cells for each condition from at least 2 independent experiments. Mann-Whitney U-test, n.s., non-significant, \*  $p \leq 0.05$ , \*\*  $p \leq 0.01$ , \*\*\*  $p \leq 0.001$ , \*\*\*\*  $p \leq 0.0001$ .

# A Statistical tests between bleached and non-bleached regions

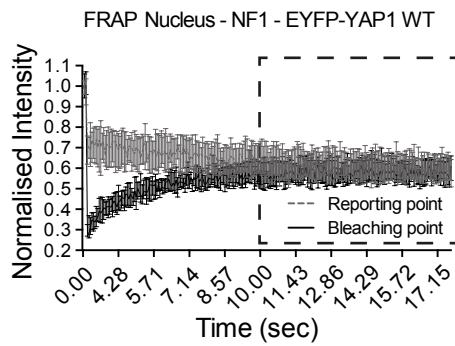

Mann Whitney U-test  
Two-tailed - 95%

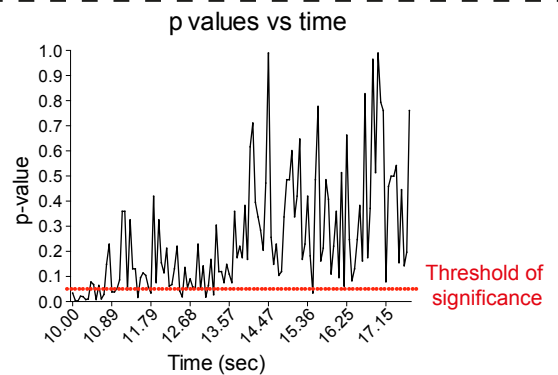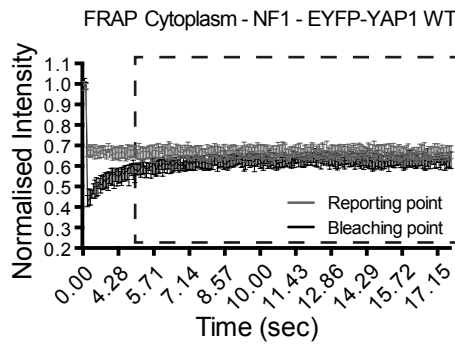

Mann Whitney U-test  
Two-tailed - 95%

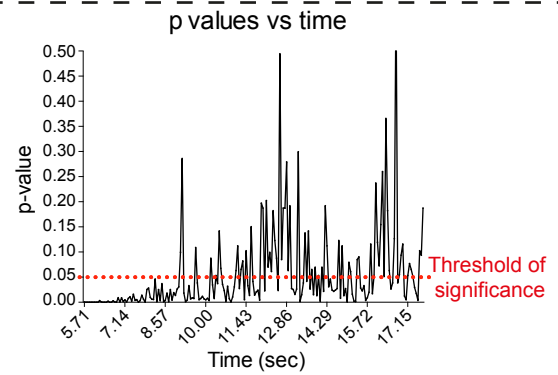

## B FRAP Nucleus - CAF1-EGFP

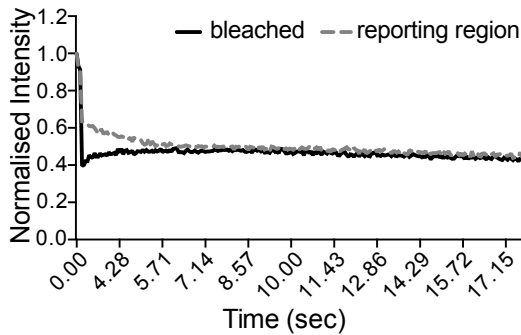

## C FRAP Nucleus - CAF1-H2B-EGFP

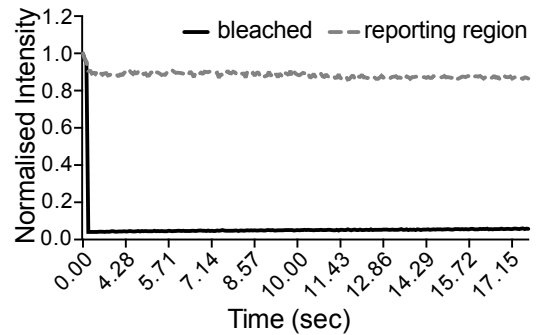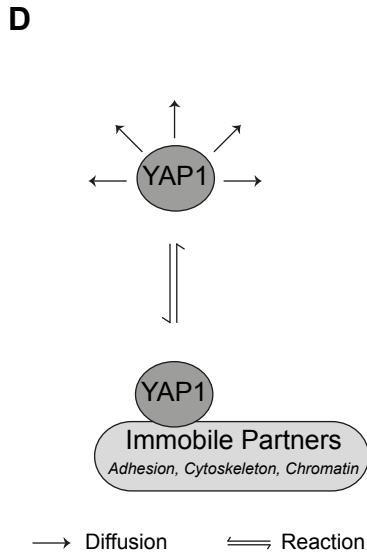

1. Large mobile fraction - Pure Diffusion  
Reaction fast relative to Diffusion  
Reaction similar to Diffusion

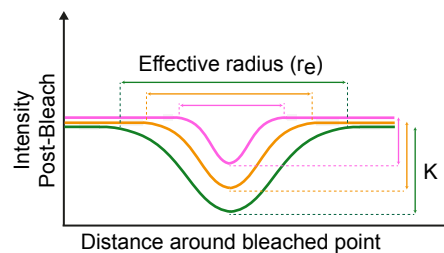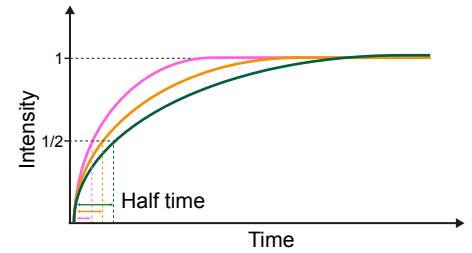

2. Diffusion fast relative to Reaction

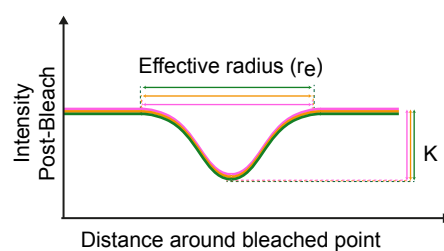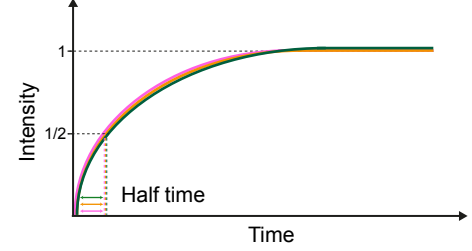

Size of bleached region: Small size Medium size Large size

**Supplemental Figure S2: FRAP experiments to identify diffusion and nuclear dissociation rates.**

**Related to Figure2:** (A) Graphs showing the evolution of the p values assessing the statistical differences between the distribution of bleached and reporting EYFP-YAP1 intensities upon nuclear and cytoplasmic FRAP in NF1. FRAP graphs (left) represent median with 95%CI. (B) Graph showing the median of EGFP intensities from bleached (plain line) and reporting (dotted line) regions in 5 representative cells upon nuclear FRAP in CAF1. (C) Graph showing the median of H2B-EGFP intensities from bleached (plain line) and reporting (dotted line) regions in 5 representative cells upon nuclear FRAP in CAF1. (D) Schematic showing effective radius ( $r_e$ ), bleach-depth ( $K$ ) and half-time plots in two contexts: 1. When diffusion is quantifiable or 2. When diffusion is too fast to be estimated. For more details, refer to Mathematical Methods. Mann-Whitney U-test, n.s., non-significant.



**Supplemental Figure S3: Diffusion is fast and does not take part in the recoveries observed upon FRAP.**

**Related to Figure2:** (A) Post-bleach profiles corresponding to (Figure2B) recoveries of intensities in CAF1 EYFP-YAP1 nuclear FRAP. (B) Box-plot (10&90) showing effective radius corresponding to (Figure2B) recoveries of intensities. (C) Box-plot (10&90) showing bleach-depth K corresponding to (Figure2B) recoveries of intensities. (D) Graph showing the median intensities of EYFP-YAP1 for three different sized bleached (plain line) and reporting (dotted line) regions upon nuclear FRAP in NF1 EYFP-YAP1. n= 20 cells for each of the sizes from 3 biological replicates. (E-G) Box-plot (10&90) showing half-time, effective radius and bleach-depth corresponding to (D) recoveries of intensities. (H) Equivalent graph to (D) upon cytoplasmic FRAP in CAF1, n= 30 cells for each small and medium sizes, 25 cells for large size from 3 biological replicates. (I-K) Box-plot (10&90) showing half-time, effective radius and bleach-depth corresponding to (H) recoveries of intensities. (L) Equivalent graph to (D) upon cytoplasmic FRAP in NF1 EYFP-YAP1. n= 30 cells for each of the sizes and from 3 biological replicates. (M-O) Box-plot (10&90) showing half-time, effective radius and bleach-depth corresponding to (L) recoveries of intensities. Mann-Whitney U-test, n.s., non-significant, \*  $p \leq 0.05$ , \*\*  $p \leq 0.01$ , \*\*\*  $p \leq 0.001$ , \*\*\*\*  $p \leq 0.0001$ .

**A**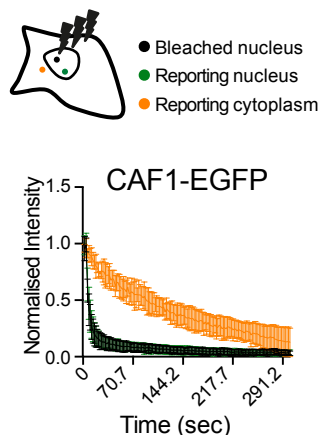**B**

Experimental vs model fitting

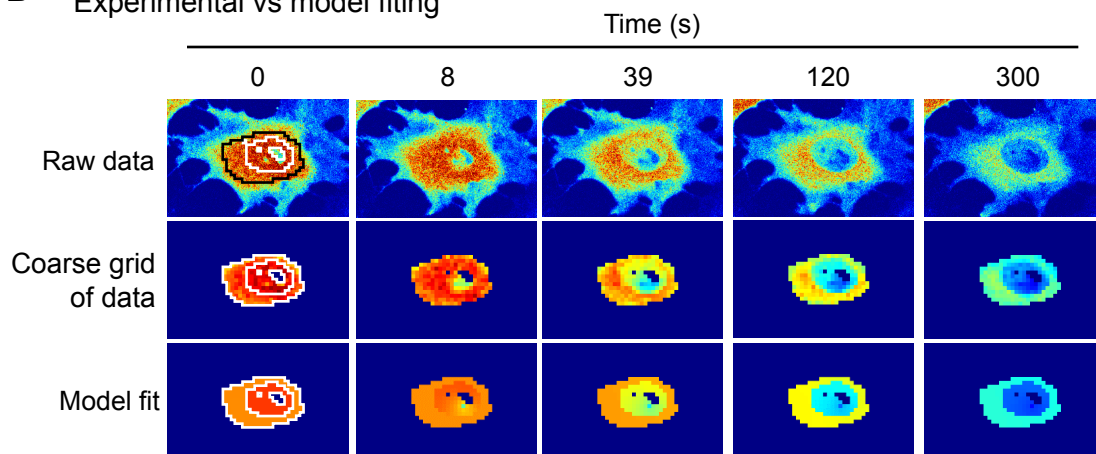**C**Experimental vs model fitting  
Different regions across the cells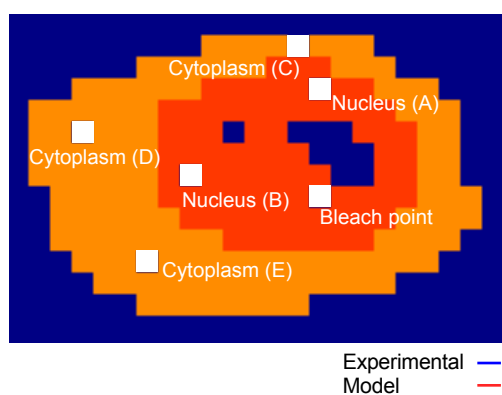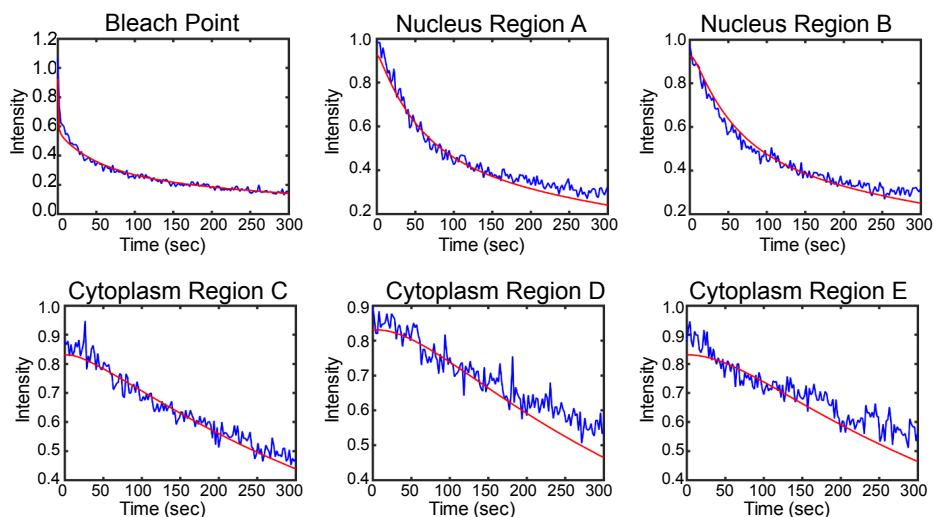**D**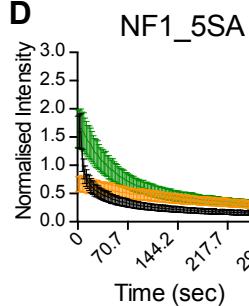**E**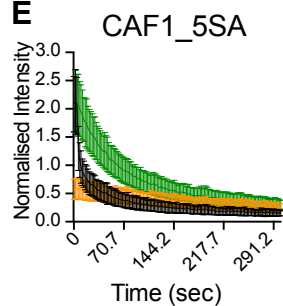**F**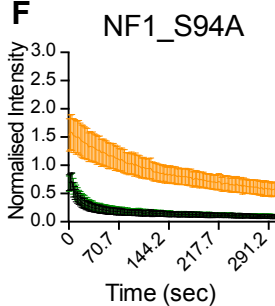**G**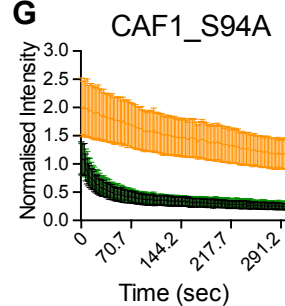**H**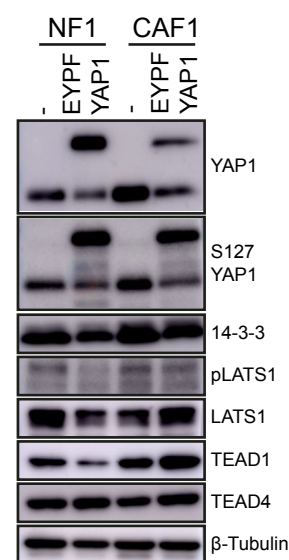**I**YAP1 steady state  
distribution

|                               | NF1    |        | CAF1   |        |
|-------------------------------|--------|--------|--------|--------|
|                               | 5SA    | S94A   | 5SA    | S94A   |
| <b>Association (Nucleus)</b>  | 0.2078 | 0.4671 | 0.1323 | 0.4819 |
| <b>Dissociation (Nucleus)</b> | 0.3    | 0.95   | 0.2    | 1.3    |
| <b>Export</b>                 | 0.0118 | 0.0505 | 0.0127 | 0.0399 |
| <b>Import</b>                 | 0.0175 | 0.0211 | 0.0265 | 0.0155 |

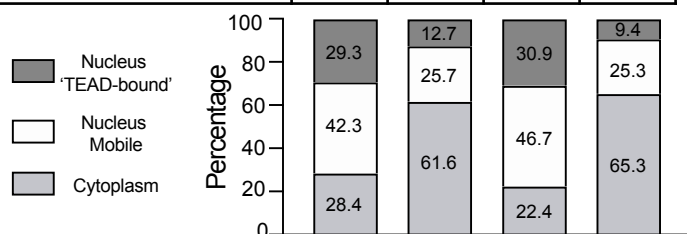



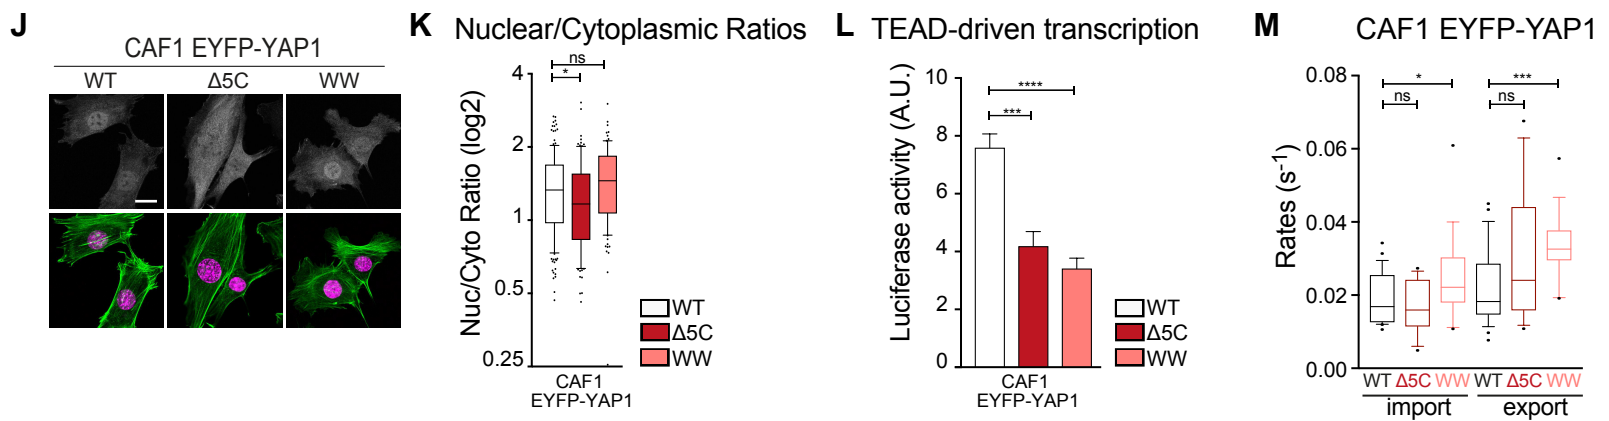

**Supplemental Figure S4: Mathematical modeling allows spatial analyses during FLIP experiments.**

**Related to Figure4:** (A) Graph showing the evolution of EGFP intensities from bleached (black), nuclear reporting (green) and cytoplasmic reporting (orange) upon nuclear FLIP in 5 representative CAF1 cells. Graph represents mean with 95%CI. (B) Comparison of experimental data to FLIP model fitting for a single CAF1 cell undergoing FLIP in the nucleus. The raw experimental data, the coarse-gridded discretization of the experimental data and FLIP PDE model fit to the coarse-gridded discretization are compared for various time-points (0s, 8s, 39s, 120s and 300s). The manually determined boundaries of the cytoplasm, nucleus and nucleoli are illustrated at 0s (see Mathematical Methods). (C) Plots of intensity versus time at the bleached point and various labelled points in the nucleus and cytoplasm for the same cell as in (B). Together B and C illustrate both good spatial and temporal fits to the experimental data. (D) Equivalent graph to (A) showing the evolution of EYFP-YAP1 5SA intensities upon nuclear FLIP in CAF1, n=26 cells from 3 biological replicates. (E) Equivalent graph to (A) showing the evolution of EYFP-YAP1\_5SA intensities upon nuclear FLIP in NF1, n=30 cells from 3 biological replicates. (F) Equivalent graph to (A) showing the evolution of EYFP-YAP1\_S94A intensities upon nuclear FLIP in NF1, n=27 cells from 3 biological replicates. (G) Equivalent graph to (A) showing the evolution of EYFP-YAP1\_S94A intensities upon nuclear FLIP in CAF1, n=25 cells from 3 biological replicates. (H) Western blot of both WT and EYFP-YAP1 expressing NF1 and CAF1. YAP1 (61 and 92kDa), S127 YAP1 (61 and 92kDa), 14-3-3 (27kDa), pLATS1 (140kDa), LATS1 (140kDa), TEAD1 (50kDa), TEAD4 (48kDa), and Beta-Tubulin (42kDa) are represented. (I) Mathematical estimation of YAP1 steady-state distribution in NF1 and CAF1 expressing 5SA and S94A mutants. (J) Representative images of EYFP-YAP1 localization in CAF1 cell lines expressing EYFP-YAP1\_WT vs EYFP-YAP1\_Δ5C or EYFP-YAP1\_WW. Scale bar, 20μm. (K) Boxplot (10&90) of nuclear-to-cytoplasmic ratio (log2 scale) corresponding to quantification of (J). n>90 cells for each condition from at least 3 independent experiments. (L) Luciferase assay of CAF1 cells expressing EYFP-YAP1\_WT vs EYFP-YAP1\_Δ5C or EYFP-YAP1\_WW. Bars represent mean ± s.e.m. of 3 independent experiments, each with 3 technical replicates. Data are normalised to NF1 EYFP-YAP1\_WT. (M) Box-plot (10&90) showing different import and export rates in CAF1 EYFP-YAP1\_WT vs CAF1 EYFP-YAP1\_WW and EYFP-YAP1\_Δ5C cell lines. CAF1 EYFP-YAP1\_WT cell line values are reproduced from Figure4C&D. Mann-Whitney U-test, n.s., non-significant, \* p<0.05, \*\* p<0.01, \*\*\* p<0.001, \*\*\*\* p<0.0001.

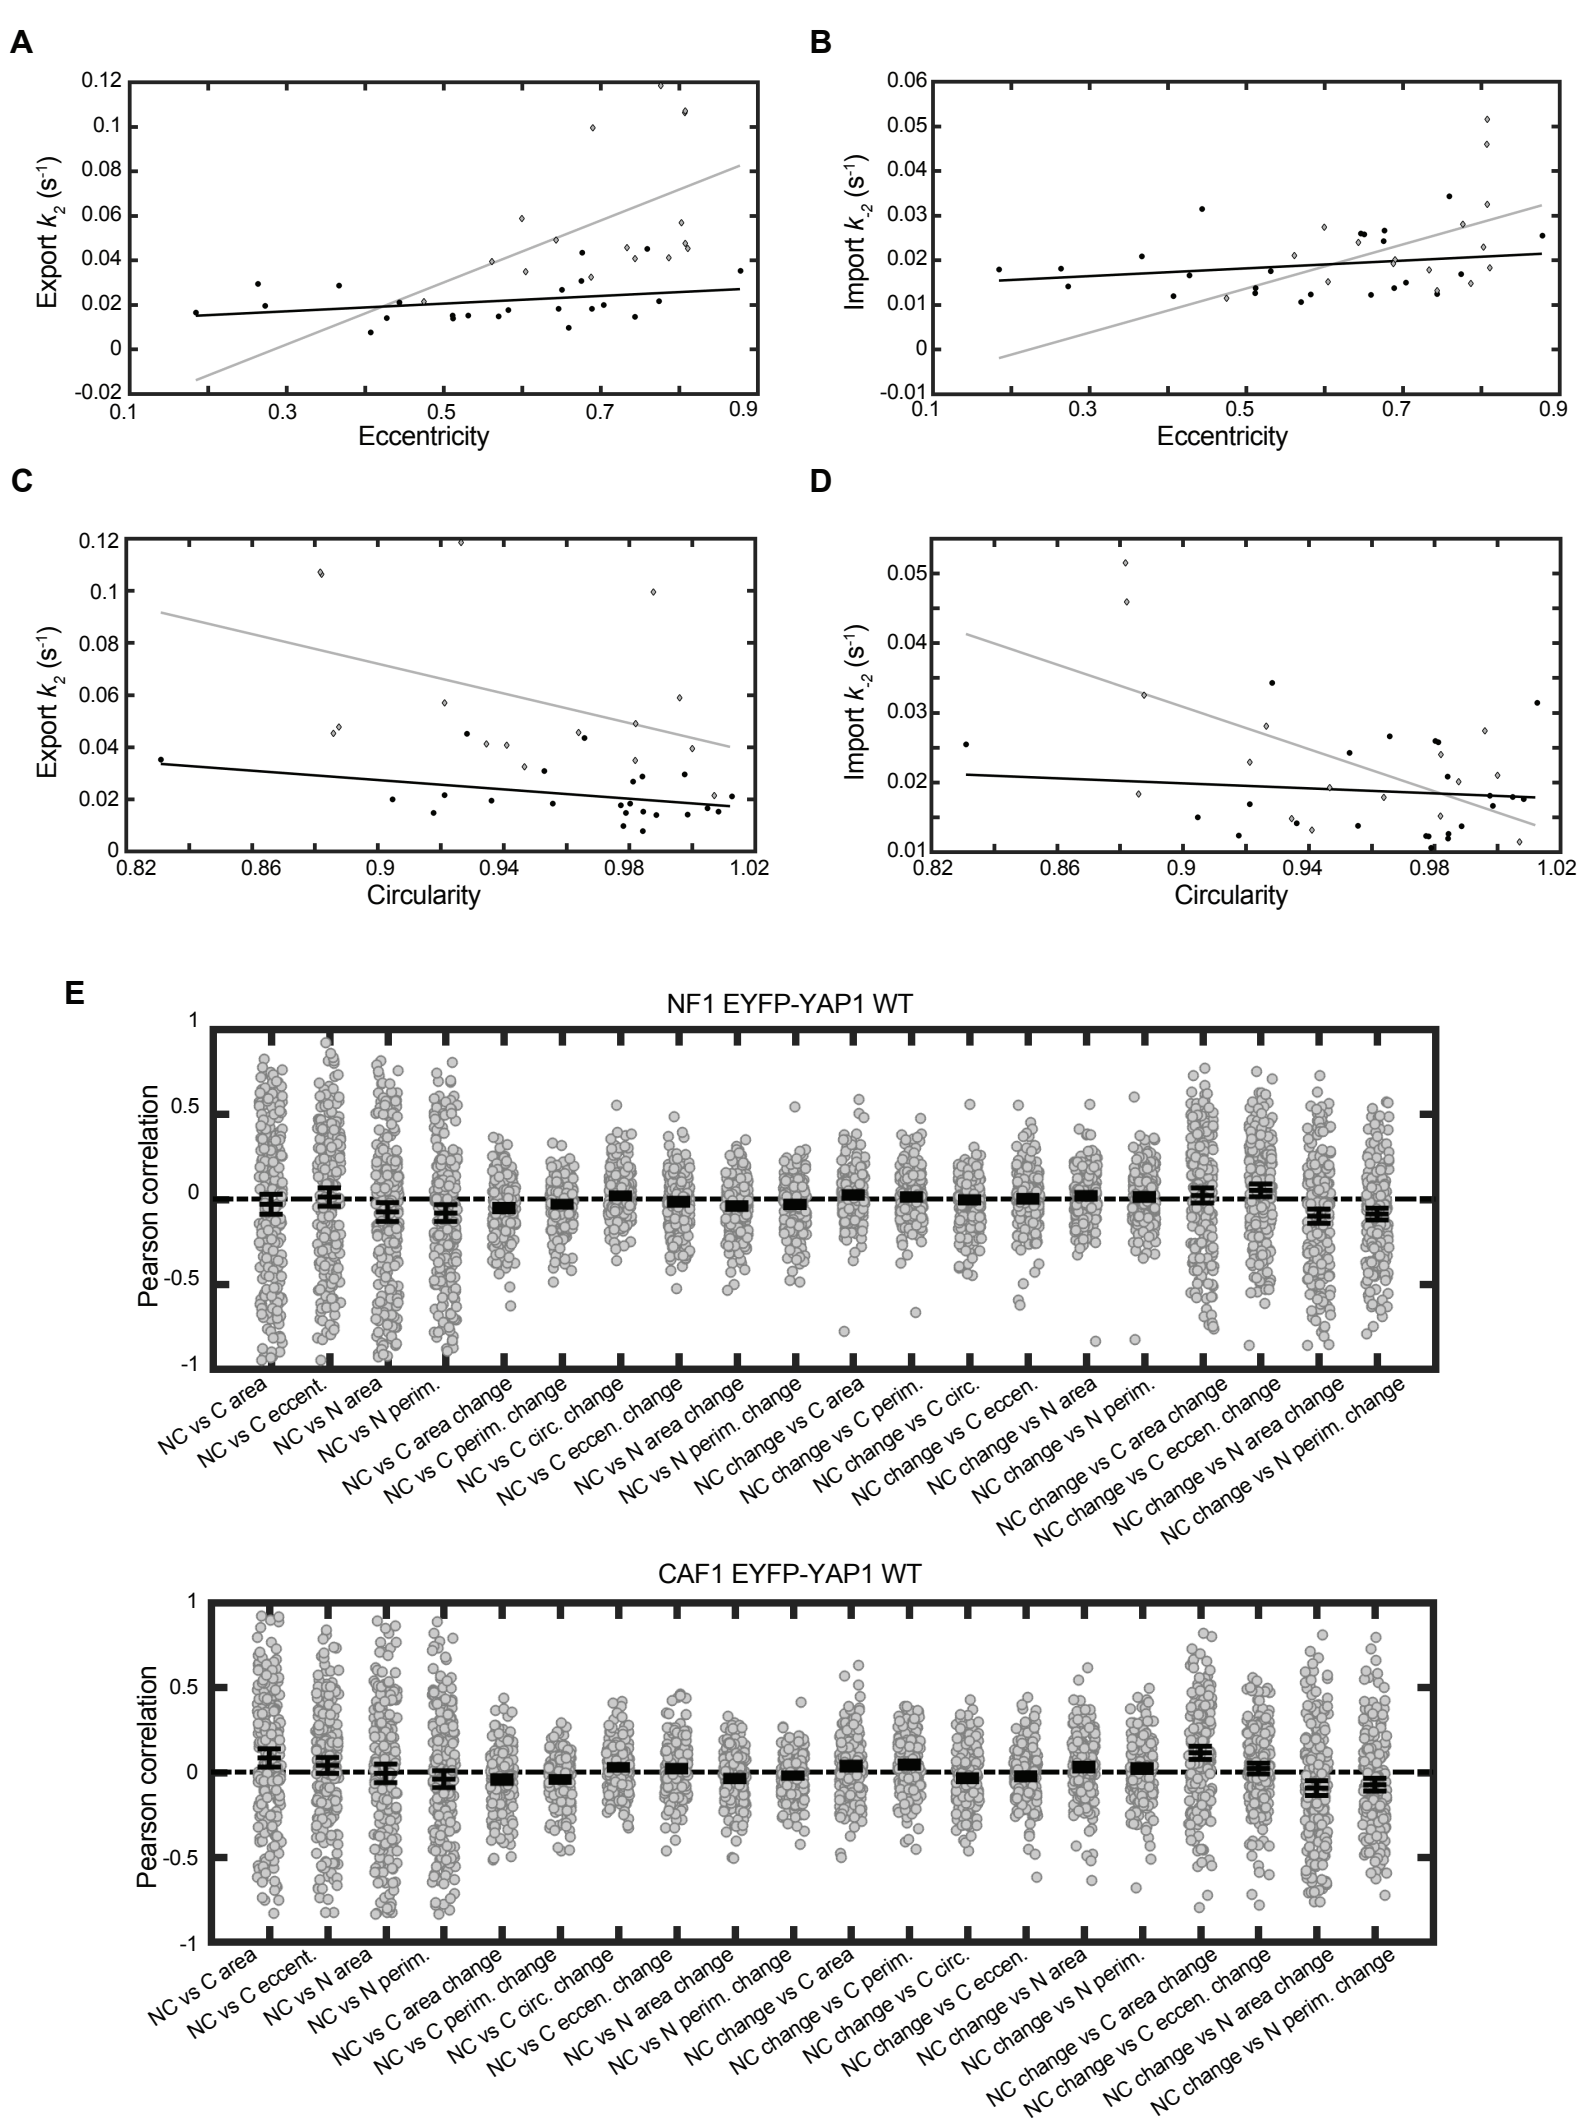

**Supplemental FigureS5: YAP1 dynamics correlates with cellular morphology.**  
 Related to Figure5: Legends next page.



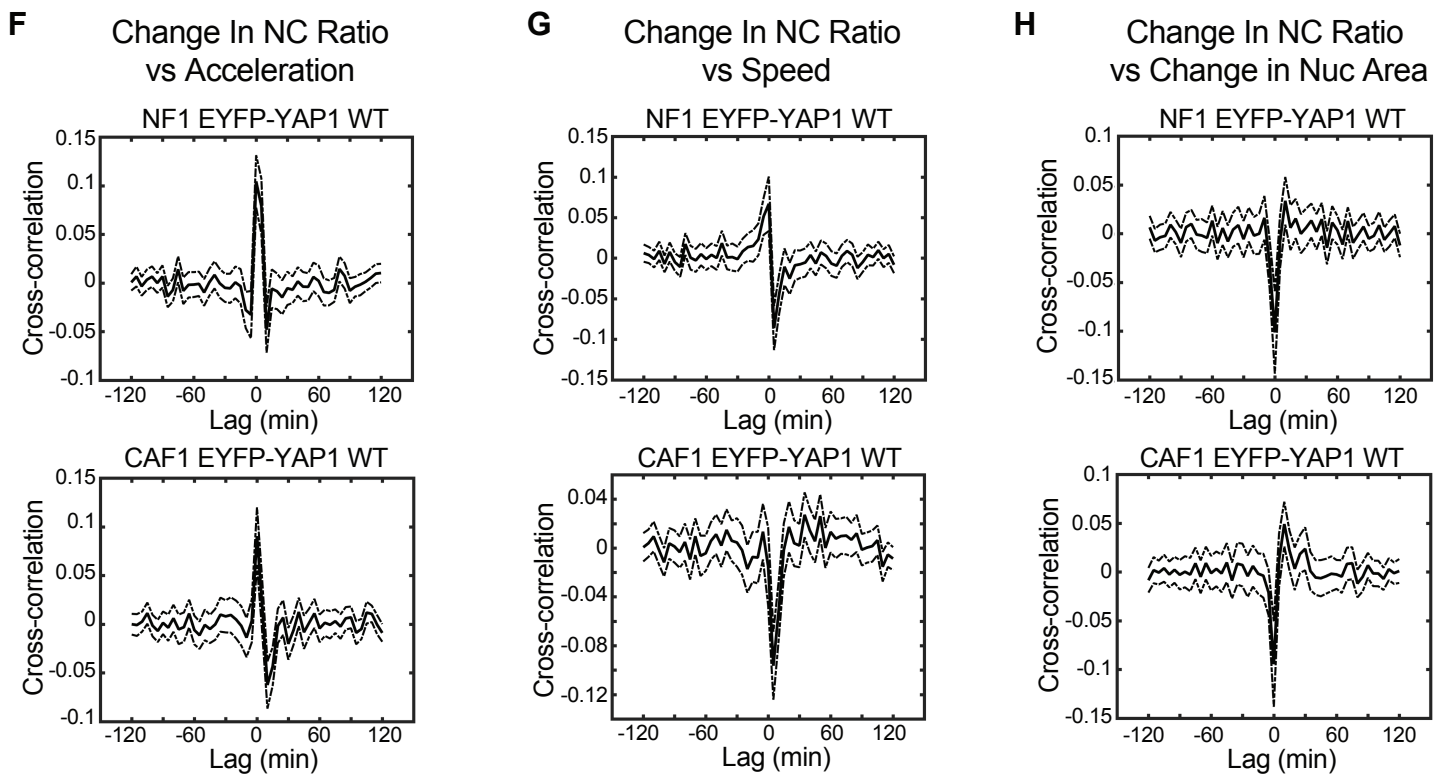

**Supplemental FigureS5: YAP1 dynamics correlates with cellular morphology.**

**Related to Figure5:** (A) Scatter plot of nuclear eccentricity vs. export and lines of best fit for NF1 EYFP-YAP1\_WT (grey) and CAF1 EYFP-YAP1\_WT (black). (B) Scatter plot of nuclear eccentricity vs. import and lines of best fit for NF1 EYFP-YAP1\_WT (grey) and CAF1 EYFP-YAP1\_WT (black). (C) Scatter plot of nuclear circularity vs. export and lines of best fit for NF1 EYFP-YAP1\_WT (grey) and CAF1 EYFP-YAP1\_WT (black). (D) Scatter plot of nuclear circularity vs. import and lines of best fit for NF1 EYFP-YAP1\_WT (grey) and CAF1 EYFP-YAP1\_WT (black). (E) Scatter plots and 95% CI for additional Pearson correlations of nuclear-to-cytoplasmic ratio, cellular morphology, cell speed and their derivatives for NF1 EYFP-YAP1\_WT and CAF1 EYFP-YAP1\_WT. (F-H) Cross-correlations of change in nuclear-to-cytoplasmic ratio with acceleration (F), speed (G) and change in nuclear area (H) for NF1 EYFP-YAP1\_WT and CAF1 EYFP-YAP1\_WT. Mean of all cells – solid line, 95% CI – dot-dash line. Mann-Whitney U-test, n.s., non-significant, \*\*  $p \leq 0.01$ .

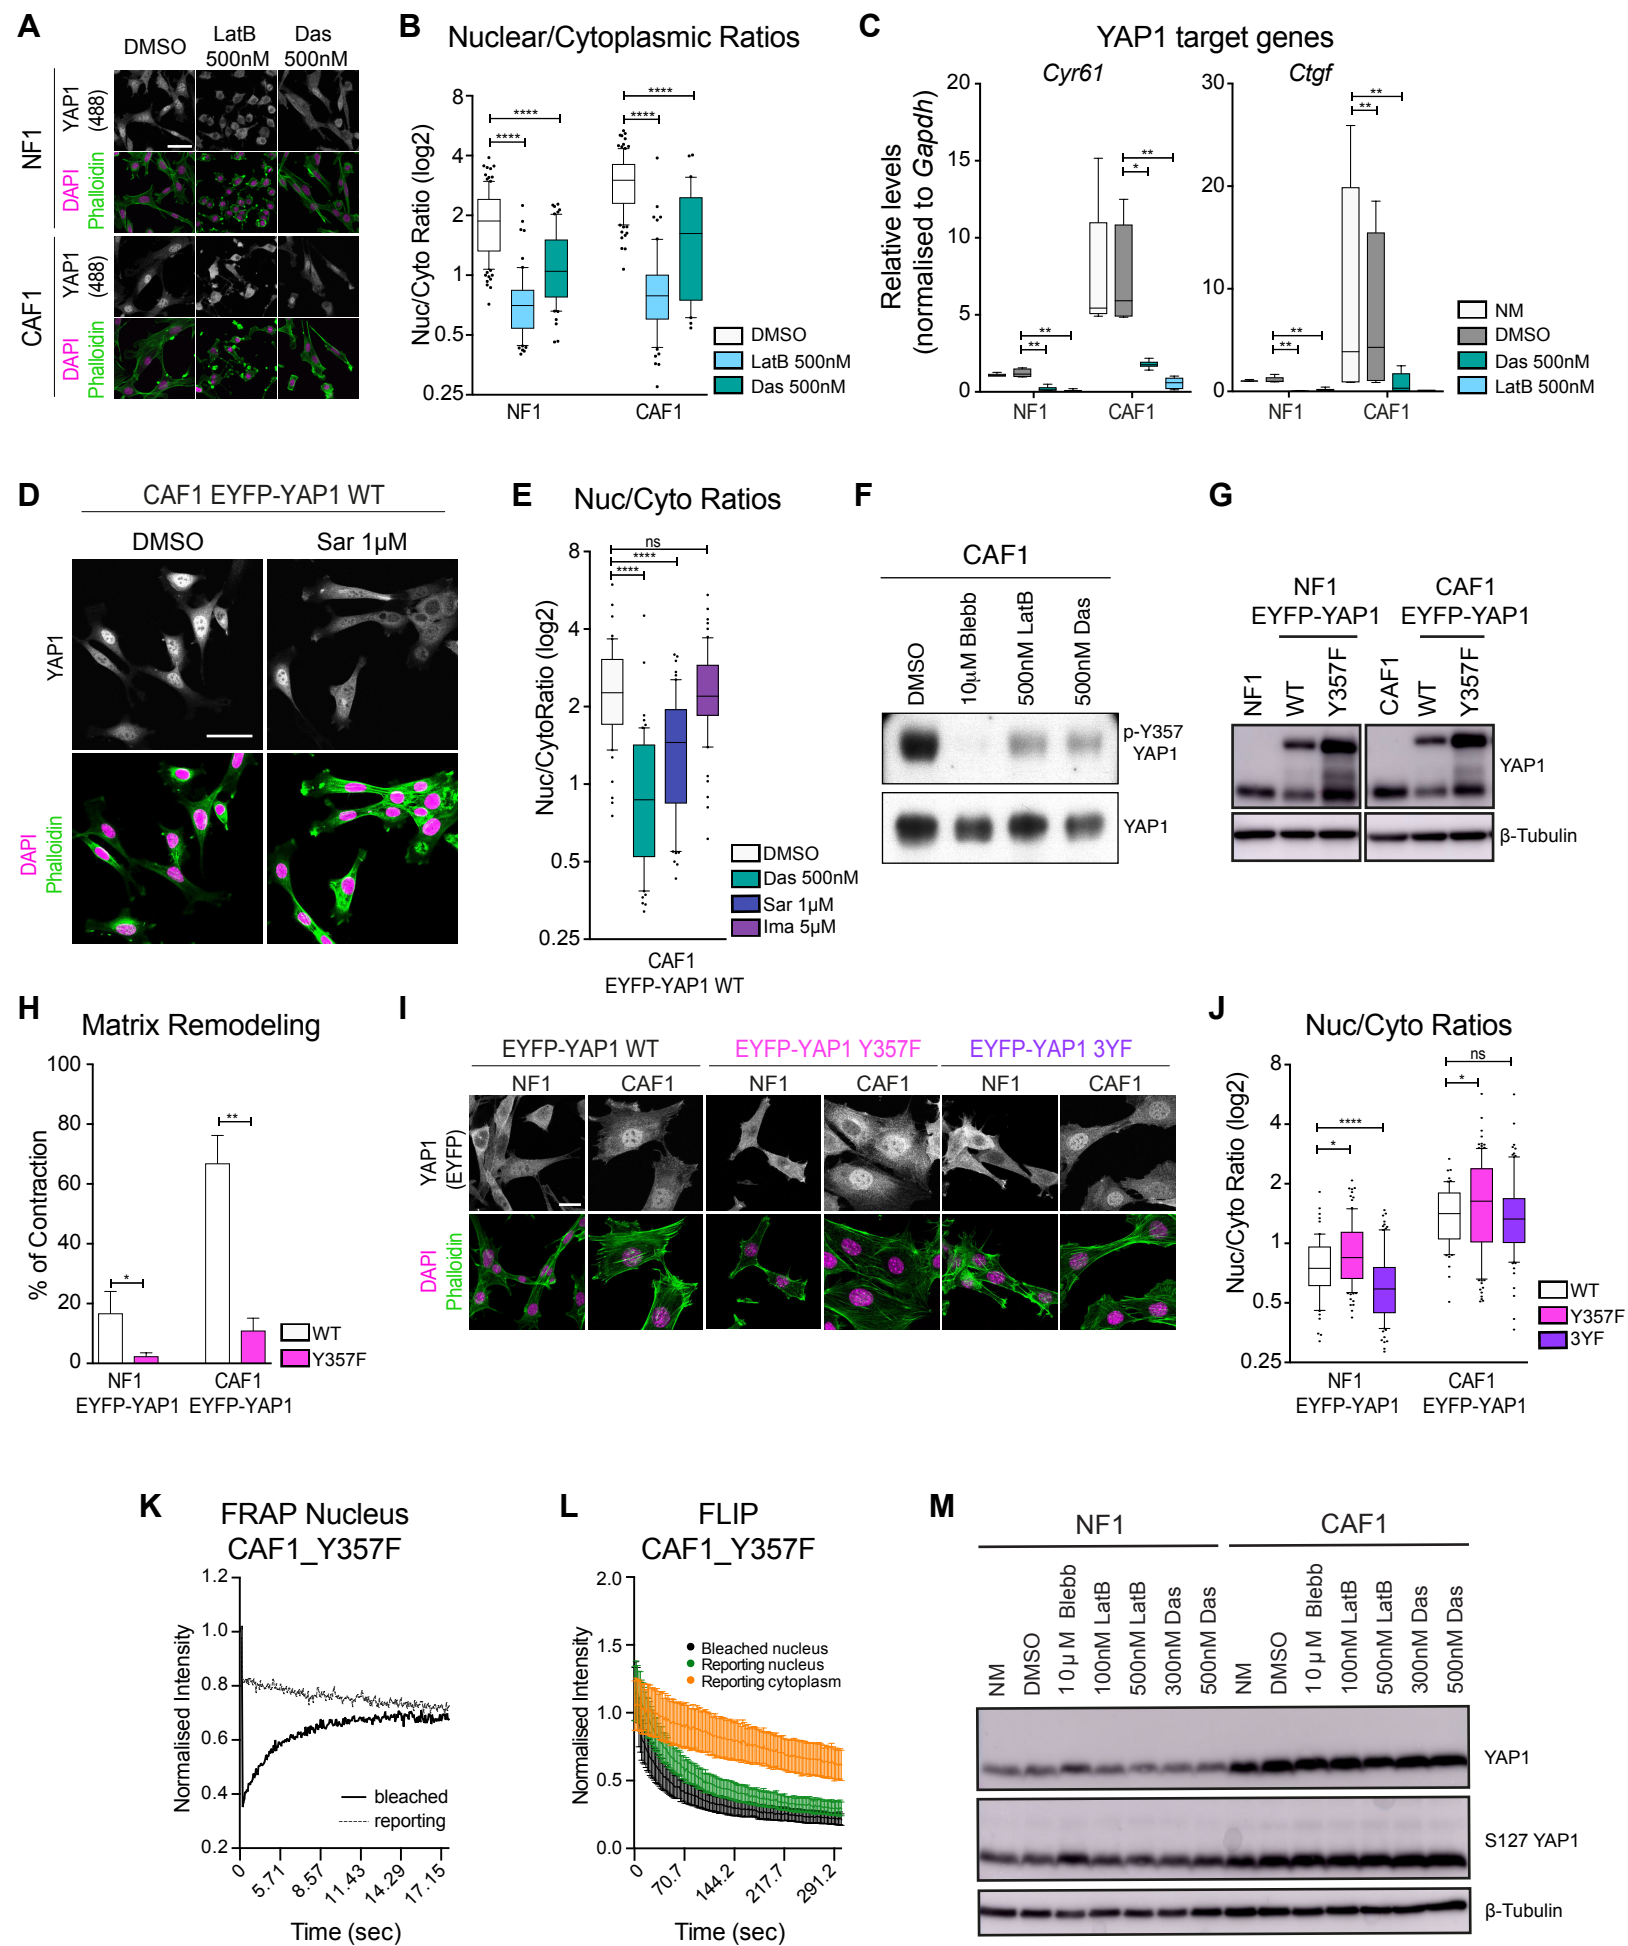

**Supplemental Figure S6: Effect of treatment with latrunculin B and dasatinib and of Y357F mutation. Related to Figure6: Legends next page.**

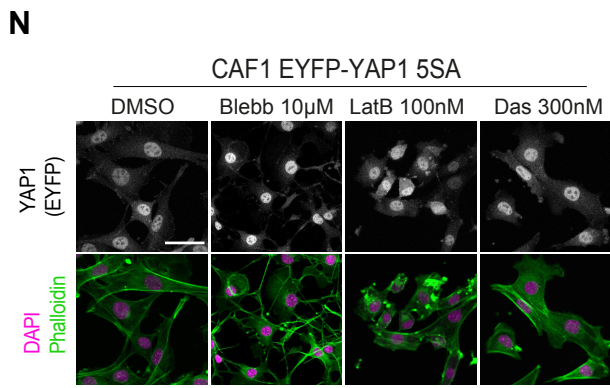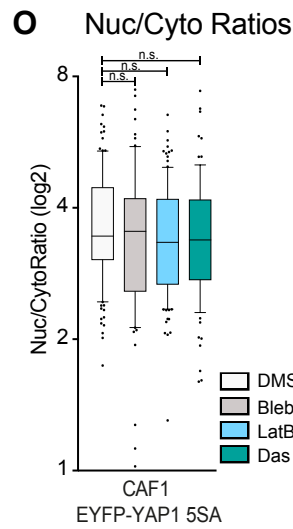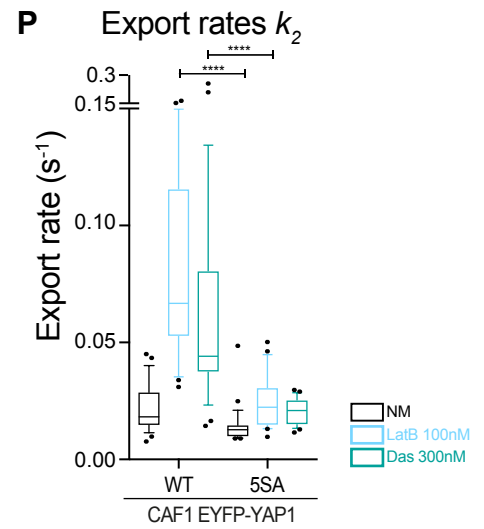

**Supplemental Figure S6: Effect of treatment with latrunculin B and dasatinib and of Y357F mutation.**

**Related to Figure6:** (A) Representative images of endogenous YAP1 localization in NF1 and CAF1 treated with DMSO or 500nM latrunculin B and 500nM dasatinib. Scale bar, 50 $\mu$ m. (B) Box-plot (10&90) of nuclear-to-cytoplasmic ratio (log2 scale) of endogenous YAP1 in NF1 and CAF1 treated with DMSO or 500nM latrunculin B and 500nM dasatinib,  $n > 30$  cells from at least 2 independent experiments. (C) Boxplot (Min to Max) of qRT-PCR of two YAP1 target genes normalised to GAPDH in NF1 and CAF1 cell lines in normal media (NM), or treated with 10 $\mu$ M DMSO, 500nM latrunculin B or 500nM dasatinib. Data summary of 3 independent experiments, each with 2 technical replicates. (D) Representative images of EYFP-YAP1 localization in CAF1 after treatment with 1 $\mu$ M saracatinib. Scale bar, 50 $\mu$ m. (E) Box-plot (10&90) of nuclear-to-cytoplasmic ratio (log2 scale) of EYFP-YAP1 localization in CAF1 after treatment with DMSO, 500nM dasatinib, 5 $\mu$ M imatinib or 1 $\mu$ M saracatinib.  $n > 60$  cells from 2 independent experiments. (F) Western blot of YAP1 Immunoprecipitation showing the effects of 10 $\mu$ M blebbistatin, 500nM latrunculin B and 500nM dasatinib treatment on Y357 YAP1 phosphorylation in CAF1 WT. Total YAP1 levels also shown. (G) Western Blot showing the expressions of EYFP-YAP1 and EYFP-YAP1\_Y357F (92kDa) versus endogenous YAP1 (61kDa), in NF1 and CAF1. Phosphorylation of Serine 127 and Tubulin (42kDa) are also presented. (H) Contraction assay of NF1 and CAF1 expressing EYFP-YAP1 vs EYFP-YAP1\_Y357F. Bars represent mean  $\pm$  s.e.m. of 5 independent experiments. (I) Representative images of EYFP-YAP1\_Y357F and EYFP-YAP1\_3YF localization in NF1 and CAF1. Scale bar, 20 $\mu$ m. (J) Box-plot (10&90) of nuclear-to-cytoplasmic ratio (log2 scale) of EYFP-YAP1, EYFP-YAP1\_Y357F and EYFP-YAP1\_3YF localization in NF1 and CAF1,  $n > 100$  cells from at least 3 independent experiments. (K) Graph showing the median intensities of EYFP-YAP1\_Y357F from bleached (plain line) and reporting (dotted line) regions upon nuclear FRAP in CAF1,  $n = 30$  cells from 3 biological replicates. (L) Graph showing the intensities of EYFP-YAP1\_Y357F from bleached (black), nuclear reporting (green) and cytoplasmic reporting (orange) regions upon nuclear FLIP in CAF1,  $n = 28$  cells from 3 biological replicates. Graph represents mean with 95%CI. (M) Western blot showing the effects of 10 $\mu$ M blebbistatin, 100/500nM latrunculin B and 300/500nM dasatinib treatment on S127 YAP1 in NF1 and CAF1 WT. (N) Representative images of EYFP-YAP1\_5SA in CAF1 treated with DMSO or 10 $\mu$ M blebbistatin, 100nM latrunculin B and 300nM dasatinib. Scale bar, 50 $\mu$ m. (O) Box-plot (10&90) of nuclear-to-cytoplasmic ratio (log2 scale) of endogenous EYFP-YAP1\_5SA in CAF1 treated with DMSO or 10 $\mu$ M blebbistatin, 100nM latrunculin B and 300nM dasatinib.  $n > 90$  cells from 3 independent experimental repeats. (P) Box-plot (10&90) showing different export rates in CAF1 EYFP-YAP1\_WT and EYFP-YAP1\_5SA cell lines upon treatment with 100nM latrunculin B and 300nM dasatinib. Rates of EYFP-YAP1\_WT are reproduced from Fig2H for representation Mann-Whitney U-test, n.s., non significant. Mann-Whitney U-test, n.s., non significant, \*  $p \leq 0.05$ , \*\*  $p \leq 0.01$ , \*\*\*\*  $p \leq 0.0001$ .

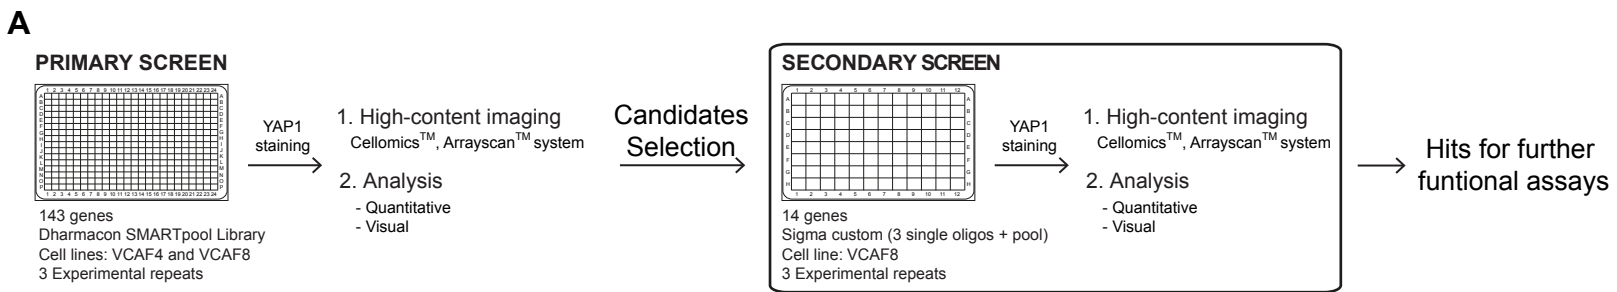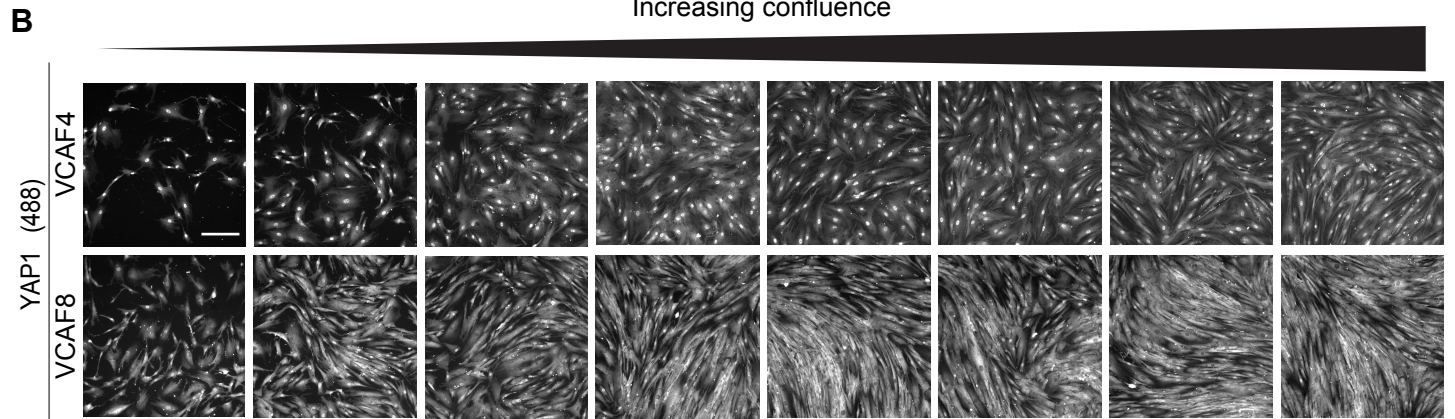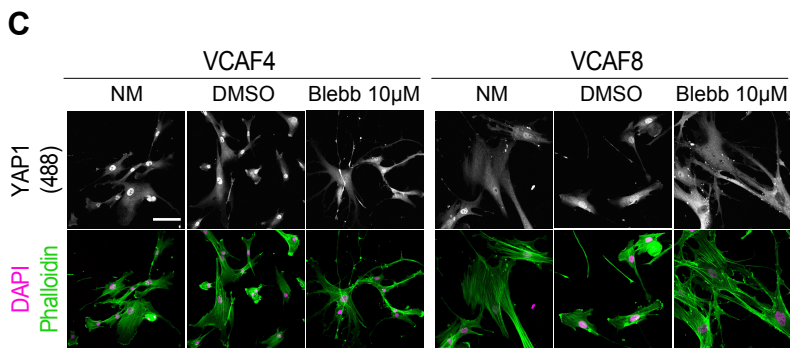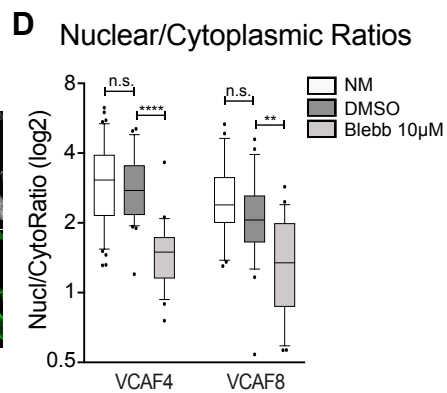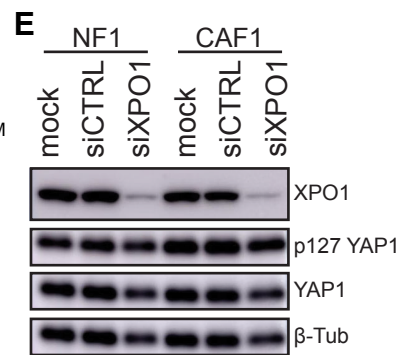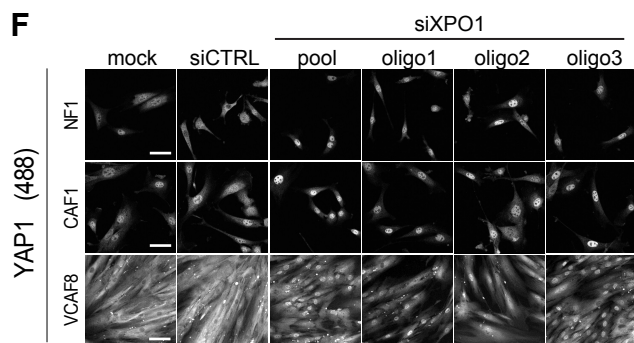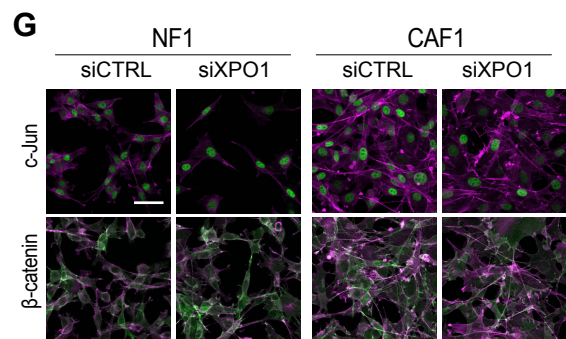

**Supplemental Figure S7: Validation of conditions and reagents for the siRNA screen. Related to Figure7: Legends next page.**



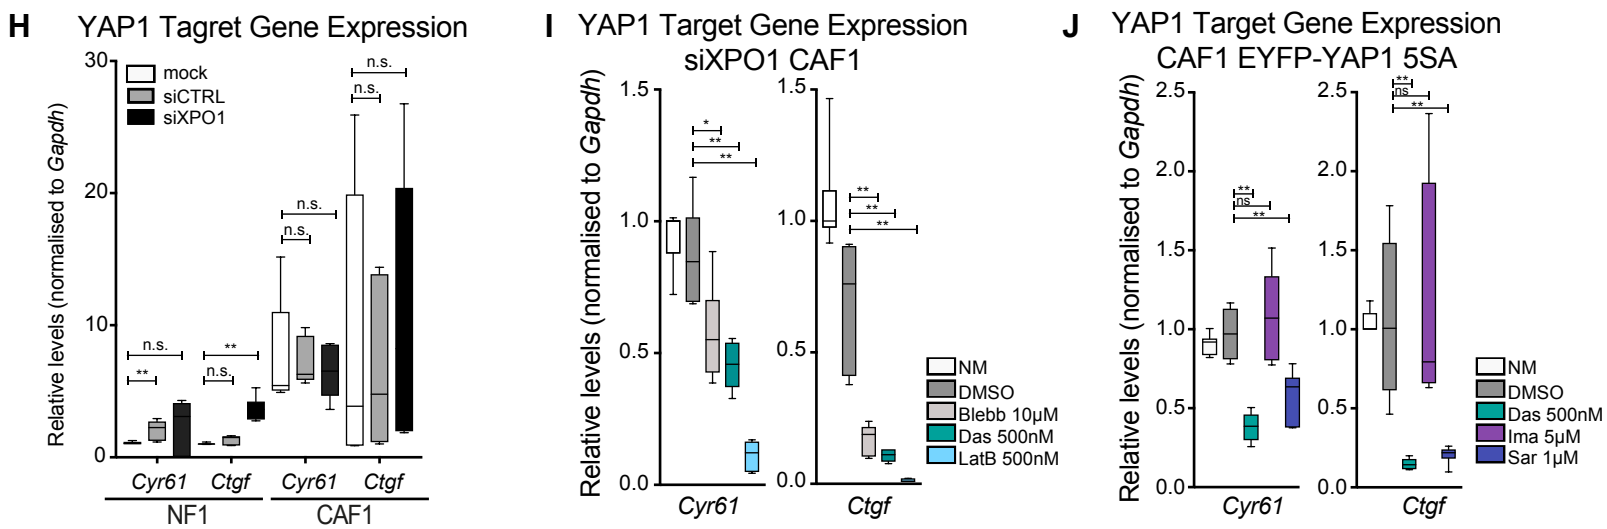

**Supplemental Figure S7: Validation of conditions and reagents for the siRNA screen.**

**Related to Figure7:** (A) Schematic representation of the screen experimental pipeline. (B) Representative images of endogenous YAP1 staining in human VCAF4 and VCAF8 cell lines with increasing cell confluence. Scale bar, 200µm. (C) Representative images showing endogenous YAP1 localization in human VCAF4 and VCAF8 cell line treated with 10µM blebbistatin. Scale bar, 100µm. (D) Box-plot (10&90) of nuclear-to-cytoplasmic ratio (log2 scale) corresponding to data in  $n > 21$  cells from one experimental repeat. (E) Western blot showing depletion of XPO1 (123kDa) in NF1 and CAF1 upon XPO1 depletion. Beta-Tubulin (42kDa) is also presented. (F) Representative images showing endogenous YAP1 localization in NF1, CAF1 and VCAF8 upon XPO1 pool deconvolution to single oligos. Scale bar, 50µm. (G) Representative images showing endogenous c-Jun or beta-catenin (green) staining upon depletion of XPO1. Actin staining also shown (magenta). Scale bar, 50 µm. (H) Boxplot (Min to Max) of qRT-PCR of two YAP1 target genes normalised to GAPDH in NF1 and CAF1 cell lines after depletion of XPO1. Data summary of 3 independent experiments, each with 2 technical replicates. (I) Boxplot (Min to Max) of qRT-PCR of two YAP1 target genes normalised to GAPDH in CAF1 cell lines after depletion of XPO1 in normal media (NM), or treated with DMSO, 10µM blebbistatin, 500nM dasatinib or 500nM Iatrunculin B. Data summary of 3 independent experiments, each with 2 technical replicates. (J) Boxplot (Min to Max) of qRT-PCR of two YAP1 target genes normalised to GAPDH in CAF1 EYFP-YAP1\_5SA cell line in normal media (NM), or treated with DMSO, 500nM dasatinib, 5µM imatinib or 1µM saracatinib. Data summary of 3 independent experiments, each with 2 technical replicates. Mann-Whitney U-test, n.s., non significant, \*  $p \leq 0.05$ , \*\*  $p \leq 0.01$ , \*\*\*\*  $p \leq 0.0001$ .

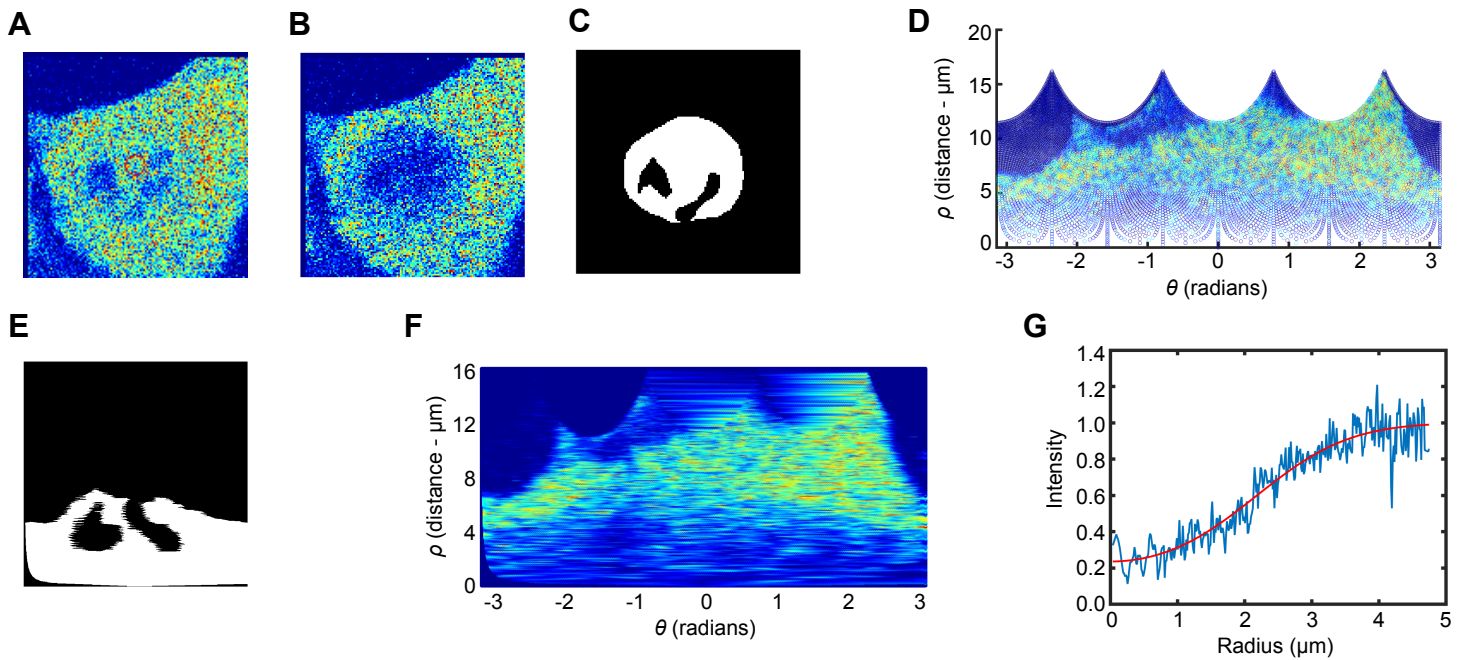

### Supplemental Figure S8: FRAP postbleach profile processing and analysis.

**Related to STAR Methods - Mathematical Methods:** Walkthrough of analysis of the postbleach profile of a single CAF WT cell undergoing FRAP. (A) Pre-bleach profile (frame prior to bleach process) re-centred such that the bleach-point (red circle) is in the centre of the image. Nucleoli are observable as regions of low intensity within the nucleus. (B) Post-bleach profile (first frame captured upon completion of bleach process) re-centred around bleach-point (red circle in (A)). (C) Image mask (re-centred around the bleach-point) outlining the manually determined boundaries of the nucleus and nucleoli. (D) Post-bleach frame in (B) transformed from Cartesian to polar coordinates. (E) Image mask in (C) transformed from Cartesian to polar coordinates. (F) Result of interpolation of data in (D). (G) Model fit of exponential of a Gaussian (Equation (1.1)) (red curve) to median intensity versus distance from bleach-point (in microns) derived from (F) (blue curve).

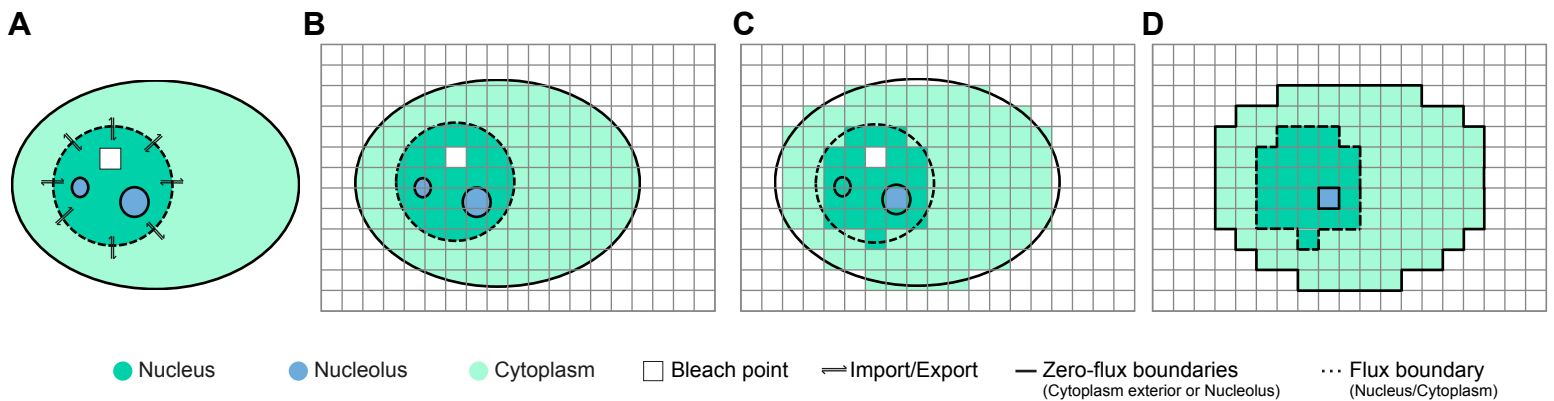

### Supplemental Figure S9: FLIP image analysis.

**Related to STAR Methods - Mathematical Methods:** Walkthrough of PDE model fitting to FLIP imaging data. (A) Schematic of Partial Differential Equation (PDE) model approximation to FLIP system. (B) Illustration of coarse-grid discretization of cell for numerically solving PDE and fitting to data. (C) Lattice-sites in the grid of (B) are determined as nuclear or cytoplasmic if at least 50% of that lattice site is composed of that cellular compartment. (D) Final coarse-gridded approximation to the original cell. Each grid-point intensity is set at the median intensity of that grid-point. Only pixels from the cellular compartment (nucleus or cytoplasm) that defines the grid-point are used in this calculation. This coarse grid is then used to fit the numerical solution of our PDE to the imaging data.

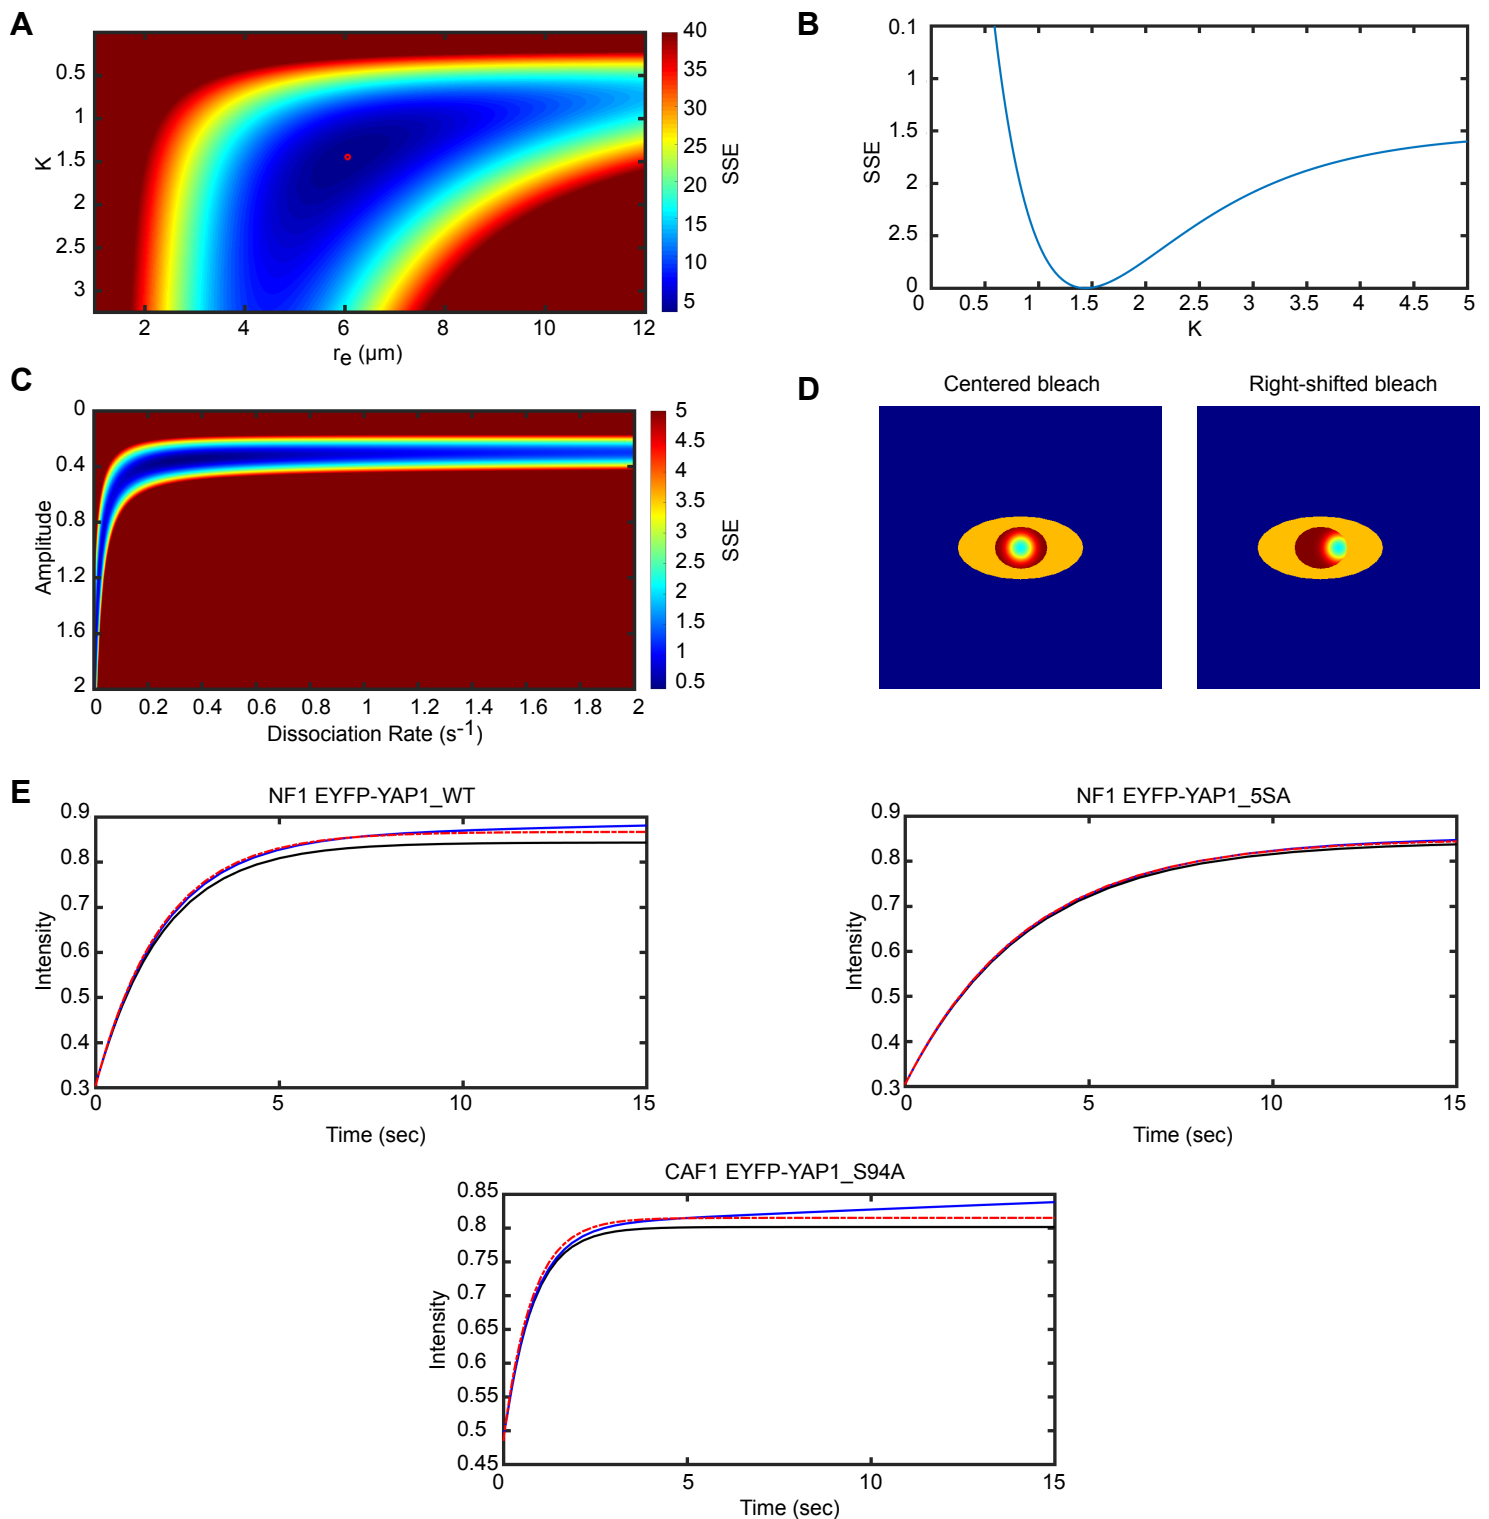

### Supplemental Figure S10: FRAP model sensitivity analysis.

**Related to STAR Methods - Mathematical Methods:** (A) Heatmap of Sum of Squares due to Error (SSE) of the exponential of a Gaussian fit (Equation (1.1)) to the median intensity (Supplemental Figure S8G) for varying bleach-depth and effective radius. The red dot signifies the global minimum. (B) Plot of SSE as the bleach-depth parameter is varied, when deriving the bleach-depth parameter from the recovery curve (Equation (1.2)) as opposed to the post-bleach profile. (C) Heatmap of SSE of the single reaction model (Equation (1.5)) fit to the recovery curve of a single cell for varying amplitude and rate of dissociation. (D) Initial protein concentrations of the nucleus and cytoplasm (red high, blue low) for sensitivity analysis of the assumption of zero import/export for CAF WT with bleach at the centre of the nucleus (left panel) and righthand side of the nucleus (right panel). (E) Bleach region recovery comparing the FLIP simulated recovery with non-zero import/export (blue), zero import/export (black) and single reaction FRAP equation (1.5) with dissociation fixed at FRAP quantified levels and other parameters fitted to the recovery with non-zero import/export (red dot-dash line). The top-left panel recovery is for NF WT with a bleach at the centre of the nucleus, top-right panel for NF 5SA with bleach at the centre of the nucleus and bottom panel is for CAF S94A with bleach on the righthand side of the nucleus.

## NF1 EYFP-YAP1 WT

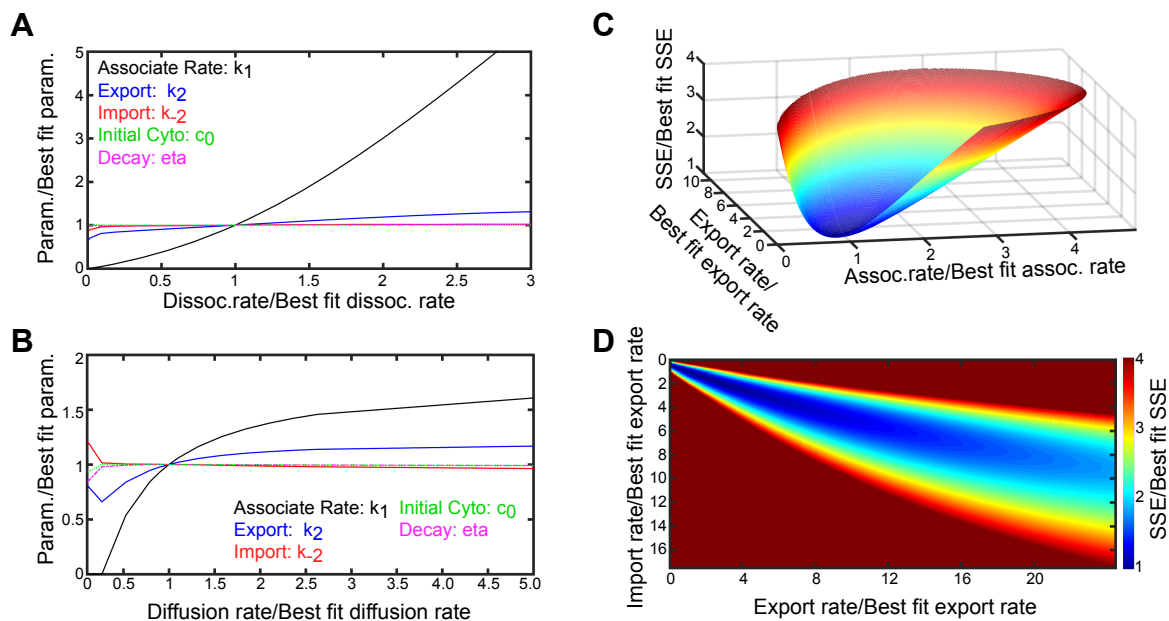

## CAF1 EYFP-YAP1 WT

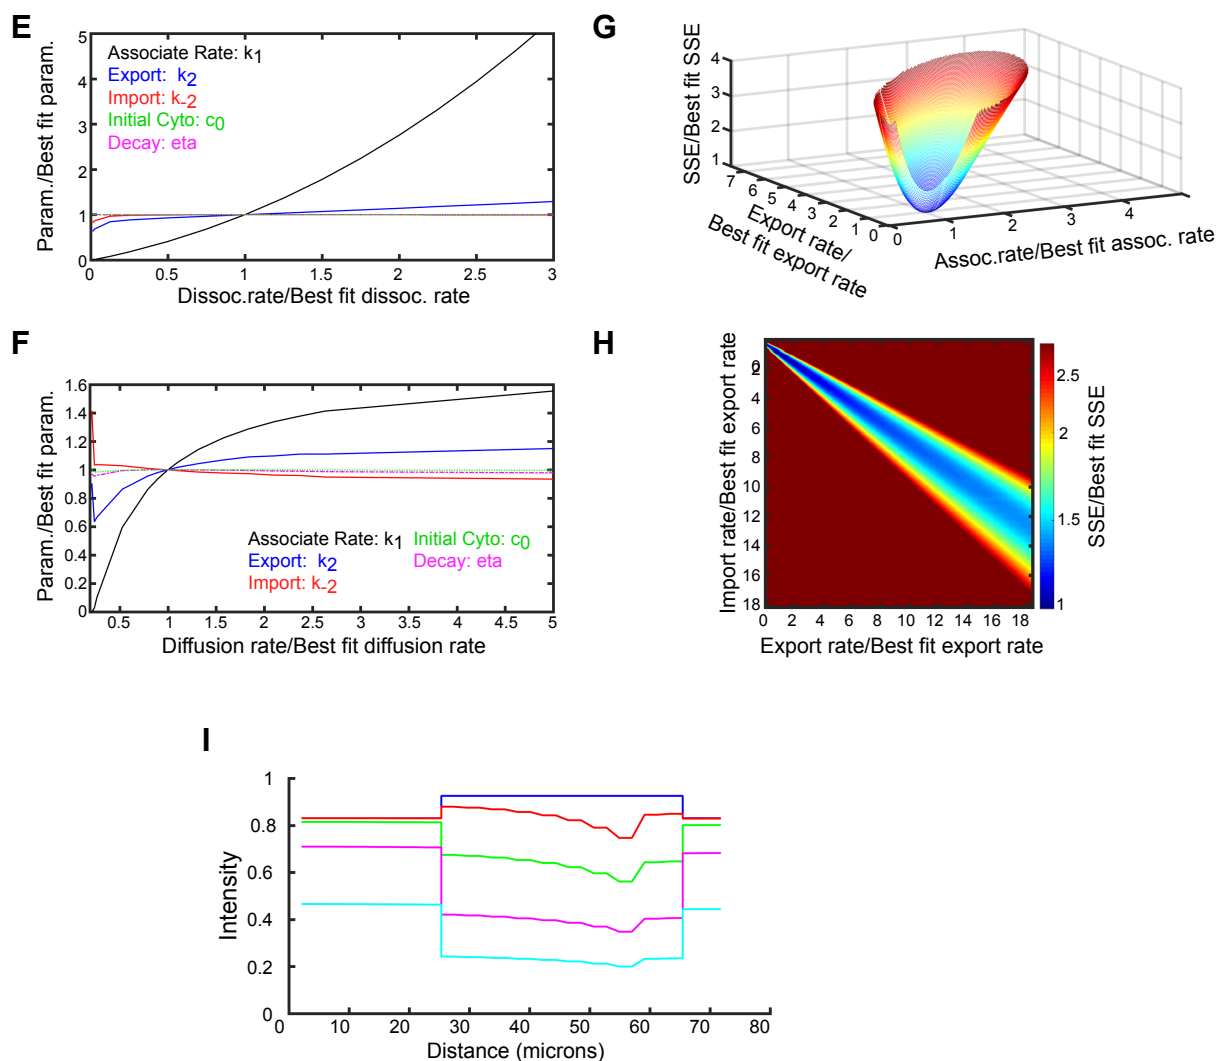

### Supplemental Figure S11: FLIP model sensitivity analysis.

**Related to STAR Methods - Mathematical Methods:** FLIP model sensitivity analysis. Sensitivity analysis of model parameters for a single NF1 EYFP-YAP1 WT cell (Plots A-D) and a single CAF1 EYFP-YAP1 WT cell (E-H). (A-E) Plots of sensitivity of association rate, export, import, predicted initial cytoplasmic concentration and decay rate due to bleaching as the fixed dissociation rate is varied. The scales are in terms of ratios of the derived parameter values for a given dissociation rate to the optimum model fit parameter values.



**(B&F)** Plots of sensitivity of association rate, export, import, predicted initial cytoplasmic concentration and decay rate due to bleaching as the fixed rate of diffusion is varied. The scales are in terms of ratios of the derived parameter values for a given rate of diffusion to the optimum model fit parameter values. **(C&G)** Surface plots of the weighted-SSE (Equation (1.29)) for varying association rate and export. Scales are presented in terms of ratio of parameter values to optimum fit parameter values and ratio of weighted-SSE for those parameter values to the weighted-SSE for optimum parameter values. **(D&H)** Heatmaps of the weighted-SSE and the overall best-fit weighted-SSE for varying import and export. Scales are again in terms of ratios of specific parameter values to optimum fit parameter values. **(I)** Horizontal linescan of complete cell for FLIP mathematical solution in Figure S4B at timepoints 0s (blue), 8s (red), 39s (green), 120s (magenta) and 300s (cyan). The discontinuous jumps in intensity illustrate the boundary of the cytoplasm and nucleus.

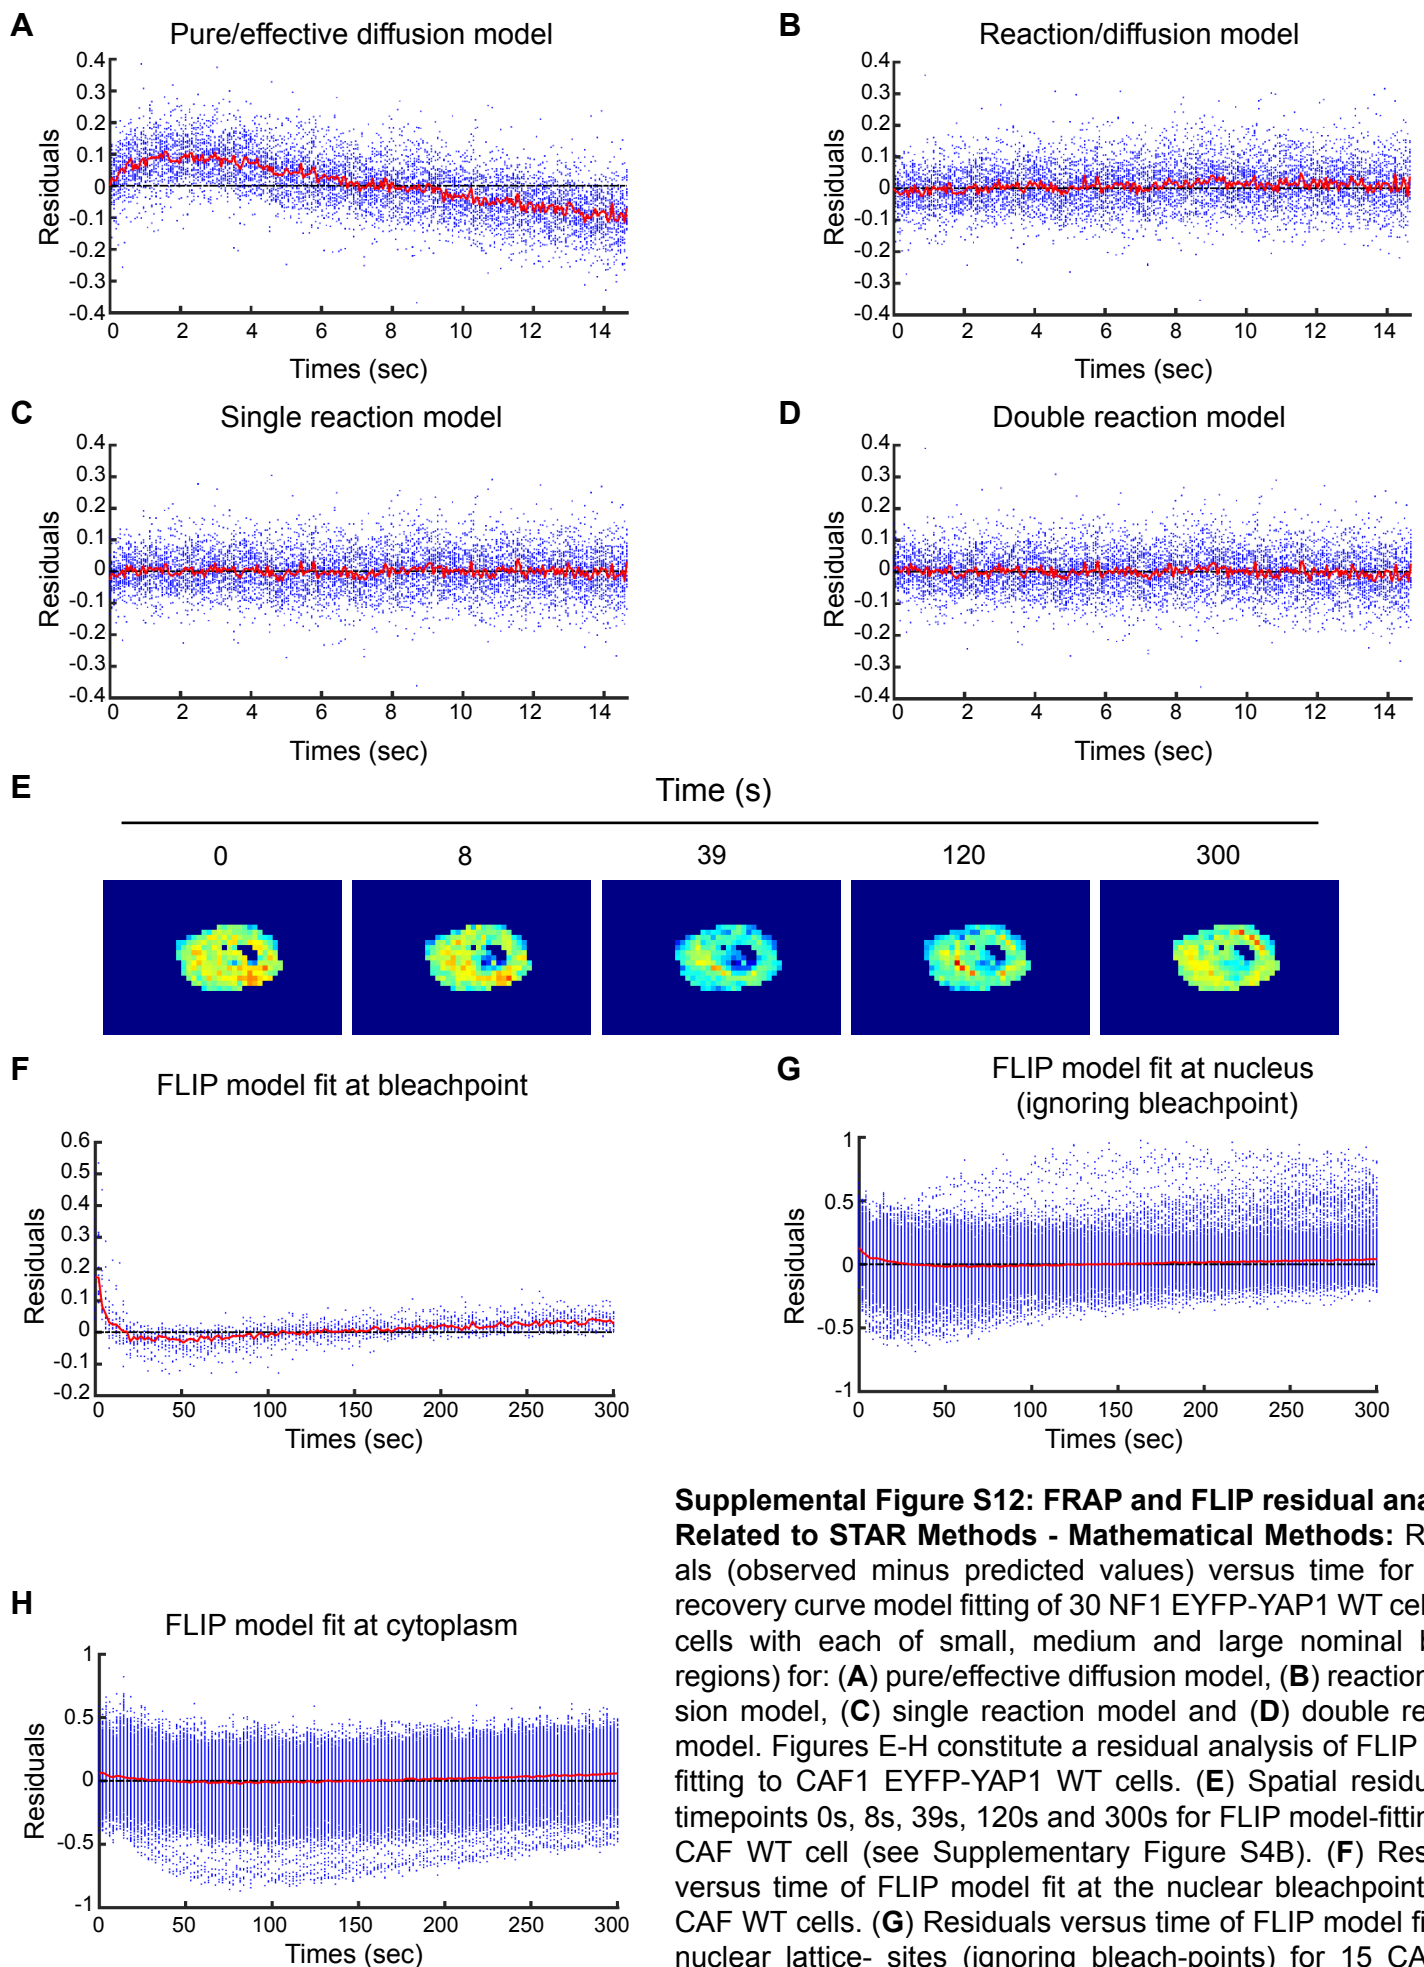

**Supplemental Figure S12: FRAP and FLIP residual analysis. Related to STAR Methods - Mathematical Methods:** Residuals (observed minus predicted values) versus time for FRAP recovery curve model fitting of 30 NF1 EYFP-YAP1 WT cells (ten cells with each of small, medium and large nominal bleach regions) for: **(A)** pure/effective diffusion model, **(B)** reaction-diffusion model, **(C)** single reaction model and **(D)** double reaction model. Figures E-H constitute a residual analysis of FLIP model fitting to CAF1 EYFP-YAP1 WT cells. **(E)** Spatial residuals at timepoints 0s, 8s, 39s, 120s and 300s for FLIP model-fitting of a CAF WT cell (see Supplementary Figure S4B). **(F)** Residuals versus time of FLIP model fit at the nuclear bleachpoint of 15 CAF WT cells. **(G)** Residuals versus time of FLIP model fit at all nuclear lattice-sites (ignoring bleach-points) for 15 CAF WT cells. **(H)** Residuals versus time of FLIP model fit at all cytoplasmic lattice-sites of 15 CAF WT cells.

**Table S1: Table compiling output of mathematical models fitting experimental data for nuclear FRAP of NF1 and CAF1 expressing EYFP-YAP1. Related to Figure 2.**

See excel file called Table S1.

Table S2: Result of the primary siRNA screen in human CAFs. Related to Figure 6.

| Targets      | VCAF8      |         |         | VCAF4   |         | Selected for secondary screen | Targets    | VCAF8      |         |         | VCAF4   |         | Selected for secondary screen | Targets       | VCAF8   |         |         | VCAF4   |            | Selected for secondary screen |
|--------------|------------|---------|---------|---------|---------|-------------------------------|------------|------------|---------|---------|---------|---------|-------------------------------|---------------|---------|---------|---------|---------|------------|-------------------------------|
|              | Repeat1    | Repeat2 | Repeat3 | Repeat1 | Repeat2 |                               |            | Repeat1    | Repeat2 | Repeat3 | Repeat1 | Repeat2 |                               |               | Repeat1 | Repeat2 | Repeat1 | Repeat2 | Repeat3    |                               |
| Risk-Free    | rf         | ND      | ND      | ND      | ND      | ND                            |            | empty well | ND      | ND      | ND      | ND      | ND                            | ACAF6         | MN      | ND      | ND      | ND      | ND         |                               |
|              | rf         | ND      | ND      | ND      | ND      | ND                            |            | empty well | ND      | ND      | ND      | ND      | ND                            | LOC340312     | ND      | ND      | ND      | ND      | ND         |                               |
|              | rf         | ND      | ND      | ND      | ND      | ND                            |            | empty well | ND      | ND      | ND      | ND      | ND                            | ACAF6         | MN      | ND      | ND      | ND      | ND         |                               |
|              | rf         | ND      | ND      | ND      | ND      | ND                            |            | empty well | ND      | ND      | ND      | ND      | ND                            | LOC401391     | ND      | MC      | ND      | MC      | ND         |                               |
|              | rf         | ND      | MC      | MC      | ND      | ND                            |            | empty well | ND      | ND      | ND      | ND      | ND                            | ANKA11        | MN      | ND      | MN      | ND      | ND         |                               |
|              | rf         | ND      | ND      | ND      | ND      | ND                            |            | empty well | ND      | ND      | ND      | ND      | ND                            | LOC402569     | ND      | ND      | ND      | MC      | ND         |                               |
|              | rf         | ND      | ND      | ND      | MC      | ND                            |            | empty well | ND      | ND      | ND      | ND      | ND                            | BDP1          | ND      | ND      | ND      | ND      | ND         |                               |
| Controls     | u5b        | N/A     | N/A     | N/A     | N/A     | N/A                           |            | empty well | ND      | ND      | ND      | ND      | ND                            | LOC402715     | MN      | ND      | ND      | ND      | ND         |                               |
|              | u5b        | N/A     | N/A     | N/A     | N/A     | N/A                           |            | empty well | ND      | ND      | ND      | ND      | ND                            | C14ORF1       | MN      | ND      | MN      | ND      | ND         |                               |
|              | u5b        | N/A     | N/A     | N/A     | N/A     | N/A                           |            | empty well | ND      | ND      | ND      | ND      | ND                            | PTTG1IP       | MN      | MN      | MN      | ND      | ND         |                               |
|              | u5b        | N/A     | N/A     | N/A     | N/A     | N/A                           |            | empty well | ND      | ND      | ND      | ND      | ND                            | C2ORF77       | ND      | ND      | MN      | ND      | ND         |                               |
|              | y5p        | N/A     | N/A     | N/A     | N/A     | N/A                           |            | empty well | MN      | ND      | ND      | MC      | ND                            | CHC1          | MN      | MN      | ND      | ND      | ND         |                               |
|              | y5p        | N/A     | N/A     | N/A     | N/A     | N/A                           |            | empty well | ND      | ND      | ND      | MC      | ND                            | C9ORF128      | MN      | ND      | MN      | ND      | ND         |                               |
|              | y5p        | N/A     | N/A     | N/A     | N/A     | N/A                           |            | empty well | ND      | ND      | ND      | ND      | ND                            | C9ORF1        | MN      | ND      | MN      | ND      | ND         |                               |
|              | y5p        | N/A     | N/A     | N/A     | N/A     | N/A                           |            | empty well | ND      | ND      | ND      | MC      | ND                            | GLE1L         | ND      | MN      | ND      | ND      | ND         |                               |
|              | y5p        | N/A     | N/A     | N/A     | N/A     | N/A                           |            | empty well | ND      | ND      | ND      | ND      | ND                            | C6orf49       | ND      | ND      | ND      | ND      | ND         |                               |
|              | y5p        | N/A     | N/A     | N/A     | N/A     | N/A                           |            | empty well | ND      | ND      | ND      | ND      | ND                            | HRB           | MN      | MN      | MN      | MN      | ND         | 2nd screen                    |
|              | y5p        | N/A     | N/A     | N/A     | N/A     | N/A                           |            | empty well | ND      | ND      | ND      | ND      | ND                            | DKFZP434F2021 | MN      | MN      | MN      | MN      | MN         |                               |
|              | ts1        | MN      | YN      | YN      | ND      | MN                            |            | empty well | ND      | ND      | ND      | ND      | ND                            | KPNA1         | ND      | ND      | ND      | ND      | MC         |                               |
|              | ts1        | MN      | YN      | YN      | ND      | MN                            |            | empty well | ND      | ND      | ND      | ND      | ND                            | DKFZP566C106  | ND      | ND      | ND      | ND      | ND         |                               |
|              | ts1        | MN      | YN      | YN      | ND      | MN                            |            | empty well | ND      | ND      | ND      | ND      | ND                            | KPNB1         | ND      | MC      | MC      | ND      | MC         |                               |
|              | ts1        | MN      | YN      | YN      | ND      | MN                            |            | empty well | ND      | ND      | ND      | MC      | ND                            | DKFZP566B1621 | MN      | MN      | MN      | ND      | MN         |                               |
| ts1          | MN         | YN      | YN      | ND      | MN      |                               | empty well | ND         | ND      | ND      | ND      | ND      | KPNA2                         | MN            | ND      | MN      | MC      | ND      |            |                               |
| ts2          | YN         | YN      | YN      | ND      | MN      |                               | empty well | ND         | ND      | ND      | ND      | ND      | DKFZP566J0619                 | MN            | ND      | ND      | MC      | ND      |            |                               |
| ts2          | ND         | ND      | ND      | ND      | ND      |                               | empty well | ND         | ND      | ND      | ND      | ND      | KPNA3                         | ND            | ND      | ND      | ND      | ND      |            |                               |
| ts2          | ND         | ND      | ND      | ND      | ND      |                               | empty well | ND         | ND      | ND      | ND      | ND      | DULLARD                       | ND            | ND      | ND      | ND      | ND      |            |                               |
| ts2          | ND         | ND      | ND      | ND      | ND      |                               | empty well | ND         | ND      | ND      | ND      | ND      | KPNA4                         | ND            | ND      | ND      | ND      | ND      |            |                               |
| ts2          | ND         | ND      | ND      | ND      | ND      |                               | empty well | ND         | ND      | ND      | ND      | ND      | SMC2                          | ND            | ND      | ND      | ND      | ND      |            |                               |
| ts2          | ND         | ND      | ND      | ND      | ND      |                               | empty well | ND         | ND      | ND      | ND      | ND      | KPNA5                         | MN            | MN      | MN      | ND      | ND      |            |                               |
| No treatment | empty well | ND      | ND      | ND      | ND      | ND                            |            | empty well | ND      | ND      | ND      | ND      | ND                            | FAM54A        | ND      | ND      | ND      | ND      | ND         |                               |
|              | empty well | ND      | ND      | ND      | ND      | ND                            |            | empty well | ND      | ND      | ND      | ND      | ND                            | TNPO1         | ND      | MC      | ND      | MC      | MC         |                               |
|              | empty well | ND      | ND      | ND      | ND      | ND                            |            | empty well | ND      | ND      | ND      | ND      | ND                            | FLJ1039       | MN      | MN      | MN      | MN      | MN         |                               |
|              | empty well | ND      | ND      | ND      | ND      | ND                            |            | empty well | ND      | ND      | ND      | ND      | ND                            | KPNB3         | ND      | ND      | ND      | ND      | ND         | 2nd screen                    |
|              | empty well | ND      | ND      | ND      | ND      | ND                            |            | empty well | ND      | ND      | ND      | ND      | ND                            | FLJ10407      | ND      | ND      | ND      | ND      | ND         |                               |
|              | empty well | ND      | ND      | ND      | ND      | ND                            |            | empty well | ND      | ND      | ND      | ND      | ND                            | NUP58         | MN      | MN      | ND      | ND      | ND         |                               |
|              | empty well | ND      | ND      | ND      | ND      | ND                            |            | empty well | ND      | ND      | ND      | ND      | ND                            | FLJ10637      | ND      | ND      | ND      | ND      | ND         |                               |
|              | empty well | ND      | ND      | ND      | ND      | ND                            |            | empty well | ND      | ND      | ND      | ND      | ND                            | NUP58         | MN      | MN      | ND      | ND      | MN         |                               |
|              | empty well | ND      | ND      | ND      | ND      | ND                            |            | empty well | ND      | ND      | ND      | ND      | ND                            | FLJ10774      | MN      | ND      | ND      | MN      | MN         |                               |
|              | empty well | ND      | ND      | ND      | ND      | ND                            |            | empty well | ND      | ND      | ND      | ND      | ND                            | RAN           | ND      | MN      | ND      | MC      | MC         |                               |
|              | empty well | ND      | ND      | ND      | ND      | ND                            |            | empty well | ND      | ND      | ND      | ND      | ND                            | FLJ11127      | ND      | MN      | MN      | ND      | ND         |                               |
|              | empty well | ND      | ND      | ND      | ND      | ND                            |            | empty well | ND      | ND      | ND      | ND      | ND                            | RANBP1        | ND      | ND      | ND      | ND      | ND         |                               |
|              | empty well | ND      | ND      | ND      | ND      | ND                            |            | empty well | ND      | ND      | ND      | ND      | ND                            | FLJ12516      | ND      | ND      | ND      | ND      | ND         |                               |
|              | empty well | ND      | ND      | ND      | ND      | ND                            |            | empty well | ND      | ND      | ND      | ND      | ND                            | RANBP2        | ND      | ND      | ND      | MC      | ND         |                               |
|              | empty well | ND      | ND      | ND      | ND      | ND                            |            | empty well | ND      | ND      | ND      | ND      | ND                            | FLJ14683      | ND      | ND      | ND      | MN      | ND         |                               |
|              | empty well | ND      | ND      | ND      | ND      | ND                            |            | empty well | ND      | ND      | ND      | ND      | ND                            | RANGAP1       | MN      | MN      | ND      | MN      | ND         | 2nd screen                    |
|              | empty well | ND      | ND      | ND      | ND      | ND                            |            | empty well | ND      | ND      | ND      | ND      | ND                            | FLJ20273      | MN      | ND      | ND      | MC      | ND         |                               |
|              | empty well | ND      | ND      | ND      | ND      | ND                            |            | empty well | ND      | ND      | ND      | ND      | ND                            | SEC13L1       | MN      | MN      | MN      | ND      | MN         |                               |
|              | empty well | ND      | ND      | ND      | ND      | ND                            |            | empty well | ND      | ND      | ND      | ND      | ND                            | FLJ20297      | MN      | MN      | MN      | ND      | ND         |                               |
|              | empty well | ND      | ND      | ND      | ND      | ND                            |            | empty well | ND      | ND      | ND      | ND      | ND                            | TPE           | MN      | MN      | MN      | ND      | ND         |                               |
| empty well   | ND         | ND      | ND      | ND      | ND      |                               | empty well | ND         | ND      | ND      | ND      | ND      | FLJ22353                      | MN            | MN      | MN      | ND      | MN      |            |                               |
| empty well   | ND         | ND      | ND      | ND      | ND      |                               | empty well | ND         | ND      | ND      | ND      | ND      | XPO1                          | ND            | ND      | ND      | MN      | YN      | 2nd screen |                               |
| empty well   | ND         | ND      | ND      | ND      | ND      |                               | empty well | ND         | ND      | ND      | ND      | ND      | FLJ23323                      | MN            | MN      | MN      | ND      | MN      |            |                               |
| empty well   | ND         | ND      | ND      | ND      | ND      |                               | empty well | ND         | ND      | ND      | ND      | ND      | ZFP98                         | MN            | MN      | MN      | ND      | MN      | 2nd screen |                               |
| empty well   | ND         | ND      | ND      | ND      | ND      |                               | empty well | ND         | ND      | ND      | ND      | ND      | FLJ30668                      | ND            | ND      | ND      | ND      | ND      |            |                               |
| empty well   | ND         | ND      | ND      | ND      | ND      |                               | empty well | ND         | ND      | ND      | ND      | ND      | NUP214                        | MN            | MN      | MN      | YN      | MN      | 2nd screen |                               |
| empty well   | ND         | ND      | ND      | ND      | ND      |                               | empty well | ND         | ND      | ND      | ND      | ND      | FLJ39369                      | MN            | MN      | MN      | ND      | ND      |            |                               |
| empty well   | ND         | ND      | ND      | ND      | ND      |                               | empty well | ND         | ND      | ND      | ND      | ND      | FAK5                          | MN            | MN      | MN      | ND      | ND      |            |                               |
| empty well   | ND         | ND      | ND      | ND      | ND      |                               | empty well | ND         | ND      | ND      | ND      | ND      | GNA2                          | ND            | ND      | ND      | MC      | ND      |            |                               |
| empty well   | ND         | ND      | ND      | ND      | ND      |                               | empty well | ND         | ND      | ND      | ND      | ND      | RAE1                          | MN            | MN      | ND      | ND      | ND      |            |                               |
| empty well   | ND         | ND      | ND      | ND      | ND      |                               | empty well | ND         | ND      | ND      | ND      | ND      | HAX1                          | ND            | ND      | ND      | MC      | MC      |            |                               |
| empty well   | ND         | ND      | ND      | ND      | ND      |                               | empty well | ND         | ND      | ND      | ND      | ND      | RANBP3                        | MN            | MN      | MN      | MN      | MN      | 2nd screen |                               |
| empty well   | ND         | ND      | ND      | ND      | ND      |                               | empty well | ND         | ND      | ND      | ND      | ND      | JMJD1B                        | MN            | MN      | MN      | MC      | MC      |            |                               |
| empty well   | ND         | ND      | ND      | ND      | ND      |                               | empty well | ND         | ND      | ND      | ND      | ND      | NUP155                        | ND            | MN      | MN      | MN      | MN      |            |                               |
| empty well   | ND         | ND      | ND      | ND      | ND      |                               | empty well | ND         | ND      | ND      | ND      | ND      | KIAA0037                      | ND            | ND      | ND      | ND      | MC      |            |                               |
| empty well   | ND         | ND      | ND      | ND      | ND      |                               | empty well | ND         | ND      | ND      | ND      | ND      | IPD13                         | ND            | ND      | ND      | ND      | ND      |            |                               |
| empty well   | ND         | ND      | ND      | ND      | ND      |                               | empty well | ND         | ND      | ND      | ND      | ND      | KIAA0133                      | MN            | MN      | MN      | ND      | ND      |            |                               |
| empty well   | ND         | ND      | ND      | ND      | ND      |                               | empty well | ND         | ND      | ND      | ND      | ND      | NUP93                         | ND            | ND      | ND      | ND      | MN      |            |                               |
| empty well   | ND         | ND      | ND      | ND      | ND      |                               | empty well | ND         | ND      | ND      | ND      | ND      | KIA1161                       | ND            | ND      | ND      | MN      | ND      |            |                               |
| empty well   | ND         | ND      | ND      | ND      | ND      |                               | empty well | ND         | ND      | ND      | ND      | ND      | NUP1                          | ND            | ND      | ND      | ND      | ND      |            |                               |
| empty well   | MC         | ND      | ND      | ND      | ND      |                               | empty well | MC         | ND      | ND      | ND      | ND      | LAP1B                         | MN            | ND      | ND      | ND      | ND      |            |                               |
| empty well   | ND         | ND      | ND      | ND      | ND      |                               | empty well | ND         | ND      | ND      | ND      | ND      | POM121                        | ND            | ND      | ND      | ND      | MC      |            |                               |
| empty well   | ND         | ND      | ND      | ND      | ND      |                               | empty well | ND         | ND      | ND      | ND      | ND      | LBR                           | ND            | MC      | VC      | ND      | ND      |            |                               |
| empty well   | ND         | ND      | ND      | ND      | ND      |                               | empty well | ND         | ND      | ND      | ND      | ND      | NUP153                        | MN            | MN      | MN      | ND      | ND      |            |                               |
| empty well   | ND         | ND      | ND      | ND      | ND      |                               | empty well | ND         | ND      | ND      | ND      | ND      | LEM2                          | MN            | ND      | ND      | ND      | ND      |            |                               |
| empty well   | ND         | ND      | ND      | ND      | ND      |                               | empty well | ND         | ND      | ND      | ND      | ND      | RANBP9                        | VC            | MC      | VC      | VC      | ND      |            |                               |
| empty well   | ND         | ND      | ND      | ND      | ND      |                               | empty well | ND         | ND      | ND      | ND      | ND      | LOC163590                     | ND            | MN      | ND      | ND      | MN      |            |                               |
| empty well   | ND         | ND      | ND      | ND      | ND      |                               | empty well | ND         | ND      | ND      | ND      | ND      | NITE2                         | MN            | ND      | ND      | MN      | MN      |            |                               |
| empty well   | ND         | ND      | ND      | ND      | ND      |                               | empty well | ND         | ND      | ND      | ND      | ND      | LOC375616                     | MN            | MN      | MN      | MN      | MN      |            |                               |
| empty well   | ND         | ND      | ND      | ND      | ND      |                               | empty well | ND         | ND      | ND      | ND      | ND      | NXF1                          | VC            | MC      | MC      | VC      | VC      |            |                               |
| empty well   | ND         | ND      | ND      | ND      | ND      |                               | empty well | ND         | ND      | ND      | ND      | ND      | MAN1                          | MN            | ND      | ND      | MC      | MN      |            |                               |
| empty well   | ND         | ND      | ND      | ND      | ND      |                               | empty well | ND         | ND      | ND      | ND      | ND      | PCB                           | ND            | MC      | ND      | ND      | ND      |            |                               |
| empty well   | ND         | ND      | ND      | ND      | ND      |                               | empty well | ND         | ND      | ND      | ND      | ND      | MGC3162                       | MN            | ND      | ND      | ND      | MC      |            |                               |
| empty well   | ND         | ND      | ND      | ND      | ND      |                               | empty well | ND         | ND      | ND      | ND      | ND      | IPO7                          | MN            | MN      | ND      | ND      | ND      |            |                               |
| empty well   | ND         | ND      | ND      | ND      | ND      |                               | empty well | ND         | ND      | ND      | ND      | ND      | MGC3329                       | MN            | ND      | ND      | ND      | ND      |            |                               |
| empty well   | ND         | ND      | ND      | ND      | ND      |                               | empty well | ND         | ND      | ND      | ND      | ND      | NUP57                         | MN            | MN      | MN      | ND      | ND      |            |                               |
| empty well   | ND         | ND      | ND      | ND      | ND      |                               | empty well | ND         | ND      | ND      |         |         |                               |               |         |         |         |         |            |                               |

**Table S3: siRNA oligonucleotide sequences. Related to STAR Methods.**

| siRNAs                               | company   | Cat. No.           | Sequence                        | Species      |
|--------------------------------------|-----------|--------------------|---------------------------------|--------------|
| CTRL Allstars Negative Control siRNA | Qiagen    | 1027280            | Proprietary                     | human, mouse |
| YAP1 oligo1                          | Dharmacon | D-046247-01        | ACAGGUGGCUCAAUUCUUG             | mouse        |
| YAP1 oligo4                          | Dharmacon | D-046247-04        | GCCGAGAAGUGCAGUCCAA             | mouse        |
| YAP1 oligo1                          | Dharmacon | D-012200-01        | GGUCAGAGAUACUUCUUA              | human        |
| YAP1 oligo2                          | Dharmacon | D-012200-02        | CCACCAAGCUAGAUAAAGA             | human        |
| YAP1 oligo3                          | Dharmacon | D-012200-03        | GAACAUAGAAGGAGAGGAG             | human        |
| YAP1 oligo4                          | Dharmacon | D-012200-04        | GCACCUAUCACUCUCGAGA             | human        |
| MST1 oligo1                          | Dharmacon | D-004157-01        | CCAGAGCUAUGGUCAGAU              | human        |
| MST1 oligo2                          | Dharmacon | D-004157-02        | GUGAAACAGUGUCUUGUAA             | human        |
| MST1 oligo3                          | Dharmacon | D-004157-03        | GAUGGGCACUGUCCGAGUA             | human        |
| MST1 oligo4                          | Dharmacon | D-004157-05        | GCAGGUCAACUUCACAGUA             | human        |
| MST2 oligo1                          | Dharmacon | D-004874-01        | GCCCAUAUGUUGUAAAGUA             | human        |
| MST2 oligo2                          | Dharmacon | D-004874-04        | ACAAGUACCUUGUUGAAUCA            | human        |
| MST2 oligo3                          | Dharmacon | D-004874-05        | CCACAAGCACGAUGAGUGA             | human        |
| MST2 oligo4                          | Dharmacon | D-004874-18        | CGGUCAAGUUGUCGCAAUU             | human        |
| LATS1 pool                           | Dharmacon | M063467010005      | GCAGAGUACUAGCAAUUU, GCAGCUGC    | mouse        |
| LATS2 pool                           | Dharmacon | M044602010005      | GCGGCAAUUUUAGACUUU, GAAAUAGC    | mouse        |
| TEAD1 pool                           | Dharmacon | M048419010005      | AUAAACCGCUCGCCAAUGU, GGAAAACU   | mouse        |
| TEAD2 pool                           | Dharmacon | M060552000005      | CGAGAGAAUUCAGUCCAA, UGAUAGAG    | mouse        |
| TEAD3 pool                           | Dharmacon | M044127010005      | GCGAGUACAUCUCAUUU, CGACAACG     | mouse        |
| TEAD4 pool                           | Dharmacon | M057322010005      | CCAAAUCU AUGACAAGUUC, GAGUACAUC | mouse        |
| HRB oligo1                           | Sigma     | SASI_Hs01_00169464 | CAGCUUUAGUGGCAGCUUU             | human        |
| HRB oligo2                           | Sigma     | SASI_Hs01_00169465 | GUCAACAGCUACAGCCAAU             | human        |
| HRB oligo3                           | Sigma     | SASI_Hs02_00337763 | CCAAAGUCGUGGCAUCAGU             | human        |
| ZFP36 oligo1                         | Sigma     | SASI_Hs02_00335603 | CCACUUCGCCACUCGAAC              | human        |
| ZFP36 oligo2                         | Sigma     | SASI_Hs01_00030373 | CUAUGUCGACCUUCUCAG              | human        |
| ZFP36 oligo3                         | Sigma     | SASI_Hs01_00030376 | CGCUACAAGACUGAGCUAU             | human        |
| RANBP3 oligo1                        | Sigma     | SASI_Hs01_00176010 | GCGAGAAGAGCAUUCGCAU             | human        |
| RANBP3 oligo2                        | Sigma     | SASI_Hs01_00176011 | CCGAUGACGGCACACUACA             | human        |
| RANBP3 oligo3                        | Sigma     | SASI_Hs01_00176012 | GACUGAUCCUCAACACCAA             | human        |
| NXF3 oligo1                          | Sigma     | SASI_Hs01_00124616 | GAUACACUCCUUAUCUAU              | human        |
| NXF3 oligo2                          | Sigma     | SASI_Hs02_00355416 | CUCUUUGUGCGGGAUACCA             | human        |
| NXF3 oligo3                          | Sigma     | SASI_Hs01_00124617 | CCUAUACU AUUUCACCCUA            | human        |
| THOC3 oligo1                         | Sigma     | SASI_Hs01_00141598 | GUGGUUAGUUUGGUCUGUU             | human        |
| THOC3 oligo2                         | Sigma     | SASI_Hs01_00141599 | GAUAGUGUGGACCAGCUUU             | human        |
| THOC3 oligo3                         | Sigma     | SASI_Hs01_00141600 | CAGCUUUGUUGGCAUCCAA             | human        |
| XPO1 oligo1                          | Sigma     | SASI_Hs01_00084184 | CUU AUGGAGGCCUUCAUU             | human        |
| XPO1 oligo2                          | Sigma     | SASI_Hs02_00335588 | CAGAU AACCC AAGUCAAU            | human        |
| XPO1 oligo3                          | Sigma     | SASI_Hs01_00084185 | CAGCUAU AUUUGCCCAUG             | human        |
| Xpo1 oligo1                          | Sigma     | SASI_Mm02_00289246 | GCCAAU AUGAGGAACAAU             | mouse        |
| Xpo1 oligo2                          | Sigma     | SASI_Mm02_00289247 | GCAUCA AUUCUUGCAUUA             | mouse        |
| Xpo1 oligo3                          | Sigma     | SASI_Mm02_00289248 | CAACCAA AUGUU AUUCA             | mouse        |
| Hrb oligo1                           | Sigma     | SASI_Mm01_00069742 | GUGAUCAAGGGAGUGGUUU             | mouse        |
| Hrb oligo2                           | Sigma     | SASI_Mm01_00069743 | CAGAU AUGGCUAGGAUUAU            | mouse        |
| Hrb oligo3                           | Sigma     | SASI_Mm01_00069744 | GGGUAAAGCUCCUGUUGGU             | mouse        |
| Thoc3 oligo1                         | Sigma     | SASI_Mm02_00334077 | GCUGUUUGGACUUCCCAAU             | mouse        |
| Thoc3 oligo2                         | Sigma     | SASI_Mm02_00334078 | GAAGGACCGCUGGUCAAA              | mouse        |
| Thoc3 oligo3                         | Sigma     | SASI_Mm01_00086842 | GAGUUAGUGUGCGUGCGGU             | mouse        |
| Zfp36 oligo1                         | Sigma     | SASI_Mm01_00178605 | GCUUUGAACUCAAUUAU               | mouse        |
| Zfp36 oligo2                         | Sigma     | SASI_Mm02_00321352 | GU AUGGAUCAGCUAGAUUCU           | mouse        |
| Zfp36 oligo3                         | Sigma     | SASI_Mm01_00178606 | CUGGUCUCCUGGAAUCUUA             | mouse        |
| Ranbp3 oligo1                        | Sigma     | SASI_Mm01_00118034 | GACUACCAUGCCCAGUCA              | mouse        |
| Ranbp3 oligo2                        | Sigma     | SASI_Mm01_00118035 | GCAAUGUGCUGCAGAUCCA             | mouse        |
| Ranbp3 oligo3                        | Sigma     | SASI_Mm01_00118036 | GAUGGAUAAGGCCAGUGAA             | mouse        |
| Nxf3 oligo1                          | Sigma     | SASI_Mm01_00191283 | GAUCCAAGAUCUAAGAAU              | mouse        |
| Nxf3 oligo2                          | Sigma     | SASI_Mm01_00191284 | GAGGAUAUGACCCAGGUGA             | mouse        |
| Nxf3 oligo3                          | Sigma     | SASI_Mm01_00191285 | CUACUUCUCAGCGAGUUCU             | mouse        |
| Xpo1 oligo1                          | Sigma     | SI02746044         | CAGGATATTCCTGCTTTCAA            | mouse        |
| Xpo1 oligo2                          | Sigma     | SI02720704         | CAGGTTCAAGTTGGAGAAGTA           | mouse        |
| Xpo1 oligo3                          | Sigma     | SI02676625         | CACATTGAATATGATAAATA            | mouse        |
| Xpo1 oligo4                          | Sigma     | SI00233828         | TACGGAAATAATAATGACTAA           | mouse        |

**Table S4: Sensitivity analysis of the zero import/export assumption in FRAP model fitting. Related to STAR Methods:** Table comparing recovery rates from FRAP experimental data (FRAP), the FLIP approximation to FRAP recovery in the presence (IE) and absence (No IE) of import and export and the ratio of the two FLIP model approximations (IE/(No IE)) for a bleach-point in the centre of the nucleus and right-shifted bleach point.

| Cell     | FRAP  | Centred bleach |       |            | Right-shifted bleach |       |            |
|----------|-------|----------------|-------|------------|----------------------|-------|------------|
|          |       | IE             | No IE | IE/(No IE) | IE                   | No IE | IE/(No IE) |
| NF_WT    | 0.550 | 0.523          | 0.547 | 0.956      | 0.525                | 0.541 | 0.970      |
| NF_5SA   | 0.300 | 0.295          | 0.298 | 0.990      | 0.295                | 0.297 | 0.993      |
| NF_S94A  | 0.950 | 0.818          | 0.941 | 0.870      | 0.850                | 0.912 | 0.931      |
| CAF_WT   | 0.400 | 0.387          | 0.399 | 0.971      | 0.387                | 0.394 | 0.983      |
| CAF_5SA  | 0.200 | 0.198          | 0.200 | 0.991      | 0.197                | 0.198 | 0.996      |
| CAF_S94A | 1.300 | 1.014          | 1.283 | 0.790      | 1.103                | 1.225 | 0.901      |
